# Supplementary material for: Metal-free visible-induced C(sp2)–C(sp2) coupling of quinoxalin-2(H)-ones via oxidative cleavage of the C–N bond
Source: Royal Society of Chemistry journal article supplement (doi:10.1039/d3ra03479h), 2023-01-01
Supplement: d3ra03479h1.pdf [file d3ra03479h1.pdf]

## **Metal-Free Visible-Induced C(sp<sup>2</sup>)-C(sp<sup>2</sup>) Coupling of Quinoxalin-2(*H*)-ones via Oxidative Cleavage of C-N Bond**

Mei Wu,<sup>†a</sup> Nancheng Lian,<sup>†b</sup> Cuimin Wu,<sup>a</sup> Xinyao Wu,<sup>a</sup> Houzheng Chen,<sup>a</sup> Chen Lin,<sup>a</sup> Sunying Zhou,<sup>\*a</sup> and Fang Ke,<sup>\*a</sup>

- <sup>a</sup>. Institute of Materia Medica, School of Pharmacy, Fujian Provincial Key Laboratory of Natural Medicine Pharmacology, Fujian Medical University, Fuzhou 350122, China. E-mail: E-mail: kefang@mail.fjmu.edu.cn.
- <sup>b</sup>. Department of Spinal Surgery, The First Affiliated Hospital of Fujian Medical University, Fuzhou 350005, China.

## Supporting information

|                                                                             |    |
|-----------------------------------------------------------------------------|----|
| 1. General information .....                                                | 3  |
| 2. General procedure for the catalytic reactions.....                       | 3  |
| 3. General procedure for the gram scale experiment .....                    | 3  |
| 4. Cyclic voltammetry experiment.....                                       | 3  |
| 5. Characterization data .....                                              | 3  |
| 6. References .....                                                         | 8  |
| 7. <sup>1</sup> H NMR and <sup>13</sup> C NMR spectra for the products..... | 9  |
| 8. Optimized Structures and Cartesian Coordinates .....                     | 34 |

## 1. General information

All reagents were purchased from commercial sources and used without further purification. All solvents were dried in a standard manner. Reactions were monitored by TLC on silica gel plates. Column chromatography was performed over silica gel (200-300 mesh) and petroleum ether/ethyl acetate. All products were characterized by NMR.  $^1\text{H}$  NMR spectra were recorded at 400 MHz and  $^{13}\text{C}$  NMR spectra were recorded at 101 MHz (Bruker DPX) with  $\text{DMSO-d}_6$  as solvent. Chemical shifts are reported in ppm using TMS as internal standard. HPLC were recorded on an SHIMADZU LC-20A instrument with a HP5-MS 30 m x 0.25 mm capillary apolar columns.

## 2. General procedure for the catalytic reactions

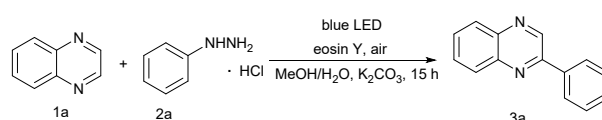

In a round bottom flask equipped with a stir bar was added 1a (0.5 mmol), 2a (1.0 mmol), eosin Y (10.0 mol%), K<sub>2</sub>CO<sub>3</sub> (1.0 mmol). The mixture was stirred at room temperature for 15 h, blue LED (12 W) in MeOH/H<sub>2</sub>O (1/1) = 4 mL solvent. The reaction mixture was extracted with ethyl acetate. The combined organic layer was washed with brine (10 mL), dried over Na<sub>2</sub>SO<sub>4</sub>. After the reaction was completed the solution of the crude product was concentrated in vacuo, and the residue was purified by column chromatography on a silica gel (petroleum ether/ethyl acetate=10/1) to afford the target product 3a as a yellow solid.

## 3. General procedure for the gram scale experiment

In a 100 ml round bottom flask equipped with a stir bar was added 1a (10.0 mmol), 2a (20.0 mmol), eosin Y (10.0 mol%), K<sub>2</sub>CO<sub>3</sub> (20.0 mmol). The mixture was stirred at room temperature for 36 h, blue light LED (12 W) in MeOH/H<sub>2</sub>O (1/1) = 45 mL solvent. After the reaction was completed the solution of the crude product was concentrated in vacuo, and the residue was purified by column chromatography on a silica gel (petroleum ether/ethyl acetate=10/1) to afford the target product 3a in 69% (1421.4 mg) as a yellow solid.

## 4. Cyclic voltammetry experiment

Cyclic voltammograms were measured using Shanghai chenhua CHI600E electrochemical workstation with electrochemical analysis software, using a conventional three-electrode cell. The working electrode was a platinum plate working electrode, the counter and reference electrodes consisted of a Pt wire and an Ag/AgCl, respectively. The platinum plate working electrode was polished with a polishing cloth before each measurement. The concentration of all tested compounds was 1 mmol L<sup>-1</sup>. The scan rate was 0.1 V/s.

## 5. Characterization data

(3a) 2-phenylquinoxaline<sup>[1]</sup>

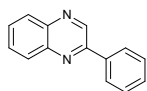

Yellow solid (89.6 mg, 87%),  $^1\text{H}$  NMR (400 MHz,  $\text{DMSO-}d_6$ )  $\delta$  9.55 (s, 1H), 8.35 – 8.28 (m, 2H), 8.10 (ddd,  $J = 8.4, 7.0, 1.9$  Hz, 2H), 7.83 (td,  $J = 7.9, 1.7$  Hz, 2H), 7.63 – 7.51 (m, 3H).  $^{13}\text{C}$  NMR (101 MHz,  $\text{DMSO-}d_6$ )  $\delta$  151.40, 144.16, 141.87, 141.53, 136.49, 131.02, 130.85, 130.30, 129.67, 129.55, 129.30, 127.91. **MS** [EI,  $m/z$ ]: 207.10 [M+H] $^+$ .

**(3b) 2-(p-tolyl)quinoxaline**<sup>[1]</sup>

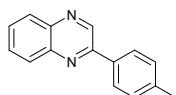

White solid (100.1 mg, 91%),  $^1\text{H}$  NMR (400 MHz,  $\text{DMSO}$ )  $\delta$  9.56 (s, 1H), 8.28 – 8.21 (m, 2H), 8.16 – 8.06 (m, 2H), 7.91 – 7.78 (m, 2H), 7.45 – 7.37 (m, 2H), 2.41 (s, 3H).  $^{13}\text{C}$  NMR (101 MHz,  $\text{DMSO-}d_6$ )  $\delta$  151.40, 144.08, 141.91, 141.42, 140.80, 133.74, 131.03, 130.22, 130.13, 129.59, 129.30, 127.82, 21.44. **MS** [EI,  $m/z$ ]: 221.10 [M+H] $^+$ .

**(3c) 2-(4-methoxyphenyl)quinoxaline**<sup>[1]</sup>

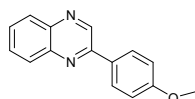

White solid (109.7 mg, 93%),  $^1\text{H}$  NMR (400 MHz,  $\text{DMSO-}d_6$ )  $\delta$  9.52 (s, 1H), 8.34 – 8.26 (m, 2H), 8.07 (dt,  $J = 8.1, 1.8$  Hz, 2H), 7.81 (dddd,  $J = 21.1, 8.4, 6.9, 1.5$  Hz, 2H), 7.15 – 7.08 (m, 2H), 3.85 (s, 3H).  $^{13}\text{C}$  NMR (101 MHz,  $\text{DMSO-}d_6$ )  $\delta$  161.70, 151.10, 143.88, 141.90, 141.14, 130.92, 129.75, 129.44, 129.26, 128.86, 115.00, 55.83. **MS** [EI,  $m/z$ ]: 237.11 [M+H] $^+$ .

**(3d) 2-(4-ethylphenyl)quinoxaline**<sup>[3]</sup>

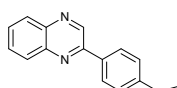

White solid (37.8 mg, 90%),  $^1\text{H}$  NMR (400 MHz,  $\text{DMSO-}d_6$ )  $\delta$  9.53 (s, 1H), 8.29 – 8.20 (m, 2H), 8.10 (ddd,  $J = 7.2, 5.0, 1.7$  Hz, 2H), 7.89 – 7.76 (m, 2H), 7.45 – 7.36 (m, 2H), 2.68 (q,  $J = 7.6$  Hz, 2H), 1.22 (t,  $J = 7.6$  Hz, 3H).  $^{13}\text{C}$  NMR (101 MHz,  $\text{DMSO-}d_6$ )  $\delta$  151.43, 146.90, 144.05, 141.94, 141.44, 134.02, 130.94, 130.05, 129.58, 129.28, 128.96, 127.90, 28.49, 15.77. **MS** [EI,  $m/z$ ]: 257.12 [M+Na] $^+$ .

**(3e) 2-(3-chlorophenyl)quinoxaline**<sup>[1]</sup>

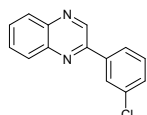

White solid (91.2 mg, 76%),  $^1\text{H}$  NMR (400 MHz,  $\text{DMSO-}d_6$ )  $\delta$  9.60 (s, 1H), 8.37 (td,  $J = 1.6, 0.9$  Hz, 1H), 8.32 – 8.28 (m, 1H), 8.17 – 8.10 (m, 2H), 7.88 (ddt,  $J = 8.0, 6.9, 5.1$  Hz, 2H), 7.64 – 7.61 (m, 2H).  $^{13}\text{C}$  NMR (101 MHz,  $\text{DMSO-}d_6$ )  $\delta$  149.93, 144.15, 141.78, 141.73, 138.57, 134.53, 131.46, 131.26, 130.79, 130.64, 129.77, 129.32, 127.50, 126.53. **MS** [EI,  $m/z$ ]: 263.70 [M+Na] $^+$

**(3f) 2-(4-bromophenyl)quinoxaline**<sup>[2]</sup>

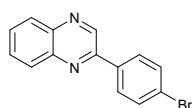

White solid (99.4 mg, 70%),  $^1\text{H}$  NMR (400 MHz,  $\text{DMSO-}d_6$ )  $\delta$  9.58 (s, 1H), 8.29 (d,  $J = 2.0$  Hz,

1H), 8.28 (d,  $J = 2.0$  Hz, 1H), 8.15 – 8.10 (m, 2H), 7.87 (ddd,  $J = 7.4, 6.3, 1.8$  Hz, 2H), 7.80 (d,  $J = 2.0$  Hz, 1H), 7.79 (d,  $J = 1.9$  Hz, 1H).  $^{13}\text{C}$  NMR (101 MHz,  $\text{DMSO-}d_6$ )  $\delta$  150.37, 143.97, 141.77, 141.63, 135.66, 132.56, 131.23, 130.61, 129.90, 129.68, 129.34, 124.79. **MS** [EI,  $m/z$ ]: 306.98  $[\text{M}+\text{Na}]^+$

**(3g) 2-(4-fluorophenyl)quinoxaline<sup>[2]</sup>**

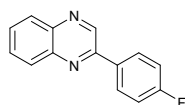

White solid (71.68 mg, 64%),  $^1\text{H}$  NMR (400 MHz,  $\text{CDCl}_3$ )  $\delta$  9.20 (s, 1H), 8.15 – 8.08 (m, 1H), 8.04 (ddd,  $J = 7.9, 6.0, 1.8$  Hz, 1H), 7.68 (ddd,  $J = 9.6, 7.8, 1.6$  Hz, 1H), 7.21 – 7.11 (m, 1H).  $^{13}\text{C}$  NMR (101 MHz,  $\text{CDCl}_3$ )  $\delta$  164.28 (d,  $J = 251.0$  Hz), 150.77, 142.88, 142.21, 141.42, 132.91 (d,  $J = 3.1$  Hz), 130.46, 129.65, 129.57, 129.54, 129.48, 129.11, 116.36, 116.15. **MS** [EI,  $m/z$ ]: 225.08  $[\text{M}+\text{H}]^+$

**(3h) 2-(2,3-dichlorophenyl)quinoxaline<sup>[4]</sup>**

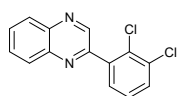

Yellow solid (94.89 mg, 69%),  $^1\text{H}$  NMR (400 MHz,  $\text{CDCl}_3$ )  $\delta$  9.21 (s, 1H), 8.27 (d,  $J = 2.1$  Hz, 1H), 8.12 – 8.00 (m, 2H), 7.96 (dd,  $J = 8.4, 2.1$  Hz, 1H), 7.78 – 7.65 (m, 2H), 7.56 (d,  $J = 8.4$  Hz, 1H).  $^{13}\text{C}$  NMR (101 MHz,  $\text{CDCl}_3$ )  $\delta$  148.25, 141.49, 141.10, 140.83, 135.59, 133.62, 132.63, 130.07, 129.66, 129.13, 128.62, 128.33, 128.18, 125.38. **MS** [EI,  $m/z$ ]: 275.10  $[\text{M}+\text{H}]^+$ .

**(3i) 2-(3-nitrophenyl)quinoxaline<sup>[1]</sup>**

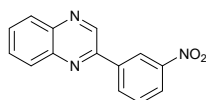

White solid (65.26 mg, 52%),  $^1\text{H}$  NMR (400 MHz,  $\text{DMSO-}d_6$ )  $\delta$  9.72 (s, 1H), 9.16 – 9.05 (m, 1H), 8.80 (d,  $J = 7.9$  Hz, 1H), 8.41 (dd,  $J = 8.2, 2.4$  Hz, 1H), 8.26 – 8.20 (m, 1H), 8.16 (d,  $J = 2.3$  Hz, 1H), 7.97 – 7.86 (m, 4H).  $^{13}\text{C}$  NMR (101 MHz,  $\text{DMSO-}d_6$ )  $\delta$  149.26, 149.03, 144.20, 141.97, 141.68, 138.14, 134.17, 131.47, 131.25, 131.15, 129.85, 129.39, 125.31, 122.35. **MS** [EI,  $m/z$ ]: 252.07  $[\text{M}+\text{H}]^+$ .

**(3j) 2-cyclohexylquinoxaline<sup>[5]</sup>**

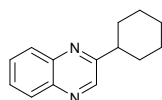

White solid (78.4 mg, 74%),  $^1\text{H}$  NMR (400 MHz,  $\text{DMSO-}d_6$ )  $\delta$  8.90 (s, 1H), 8.10 – 7.96 (m, 2H), 7.84 – 7.71 (m, 2H), 2.96 (tt,  $J = 11.8, 3.4$  Hz, 1H), 1.93 (dtt,  $J = 10.7, 3.4, 1.6$  Hz, 2H), 1.86 – 1.77 (m, 2H), 1.74 – 1.65 (m, 1H), 1.61 (td,  $J = 12.4, 3.2$  Hz, 2H), 1.40 (qt,  $J = 12.6, 3.3$  Hz, 2H), 1.32 – 1.19 (m, 1H).  $^{13}\text{C}$  NMR (101 MHz,  $\text{DMSO-}d_6$ )  $\delta$  161.41, 146.12, 141.86, 141.29, 130.43, 129.51, 129.27, 129.15, 44.15, 32.09, 26.29, 25.92. **MS** [EI,  $m/z$ ]: 213.14  $[\text{M}+\text{H}]^+$

**(3k) 2-(thiophen-2-yl)quinoxaline<sup>[1]</sup>**

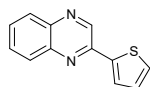

White solid (67.8 mg, 64%),  $^1\text{H}$  NMR (400 MHz,  $\text{DMSO-}d_6$ )  $\delta$  9.57 (s, 1H), 8.24 (d,  $J = 1.1$  Hz, 1H), 8.11 – 7.98 (m, 2H), 7.88 – 7.76 (m, 3H), 7.30 (dd,  $J = 5.0, 3.7$  Hz, 1H).  $^{13}\text{C}$  NMR (101 MHz,  $\text{DMSO-}d_6$ )  $\delta$  147.66, 143.25, 142.22, 141.68, 141.24, 131.50, 131.26, 129.92, 129.41 (d,  $J = 3.8$  Hz),

129.17, 129.00. **MS** [EI, m/z]: 213.04 [M+H]<sup>+</sup>

**(3l) 2-(furan-2-yl)quinoxaline<sup>[1]</sup>**

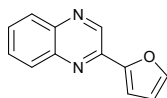

White solid (67.6 mg, 69%), <sup>1</sup>H NMR (400 MHz, DMSO-*d*<sub>6</sub>) δ 9.33 (s, 1H), 8.02 (dd, *J* = 8.3, 1.7 Hz, 3H), 7.78 (dddd, *J* = 21.6, 8.3, 6.9, 1.6 Hz, 2H), 7.54 (dd, *J* = 3.5, 0.8 Hz, 1H), 6.77 (dd, *J* = 3.5, 1.7 Hz, 1H). <sup>13</sup>C NMR (101 MHz, DMSO-*d*<sub>6</sub>) δ 151.39, 146.57, 143.89, 142.88, 141.74, 141.05, 131.16, 129.96, 129.36, 129.21, 113.26. **MS** [EI, m/z]: 197.97 [M+H]<sup>+</sup>

**(3m) 2-(naphthalen-2-yl)quinoxaline<sup>[1]</sup>**

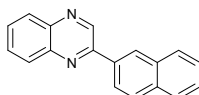

White solid (88.3 mg, 69%), <sup>1</sup>H NMR (400 MHz, DMSO-*d*<sub>6</sub>) δ 9.76 (s, 1H), 8.97 (d, *J* = 1.8 Hz, 1H), 8.49 (dd, *J* = 8.7, 1.8 Hz, 1H), 8.19 (dd, *J* = 8.3, 1.6 Hz, 1H), 8.14 (t, *J* = 8.9 Hz, 3H), 8.01 (dd, *J* = 6.0, 3.4 Hz, 1H), 7.92 – 7.83 (m, 2H), 7.63 (dt, *J* = 6.3, 3.5 Hz, 2H). <sup>13</sup>C NMR (101 MHz, DMSO-*d*<sub>6</sub>) δ 151.32, 144.46, 141.95, 141.55, 134.22, 133.85, 133.45, 131.15, 130.40, 129.70, 129.37, 129.23, 128.17, 128.01 (d, *J* = 3.4 Hz), 127.29, 124.78. **MS** [EI, m/z]: 257.10 [M+H]<sup>+</sup>

**(3n) 6-methyl-2-phenylquinoxaline and 7-methyl-2-phenylquinoxaline<sup>[1]</sup>**

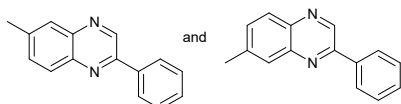

White solid (100.1 mg, 91%), <sup>1</sup>H NMR (400 MHz, DMSO-*d*<sub>6</sub>) δ 9.47 (d, *J* = 9.8 Hz, 1H), 8.28 (dt, *J* = 8.0, 2.3 Hz, 2H), 7.67–7.51 (m, 4H). <sup>13</sup>C NMR (101 MHz, DMSO-*d*<sub>6</sub>) δ 151.25, 150.55, 143.92, 143.13, 141.92 (d, *J* = 1.3 Hz), 141.57, 141.15, 140.47, 140.30, 140.02, 136.63, 133.12, 132.41, 130.73, 130.62, 129.52, 129.20, 128.82, 128.39, 128.05, 127.81, 127.71, 21.73 (d, *J* = 3.5 Hz). **MS** [EI, m/z]: 221.10 [M+H]<sup>+</sup>, 243.10[M+Na]<sup>+</sup>.

**(3o) 6,7-dimethyl-2-phenylquinoxaline<sup>[2]</sup>**

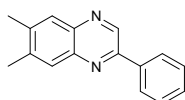

White solid (102.96 mg, 88%), <sup>1</sup>H NMR (400 MHz, DMSO-*d*<sub>6</sub>) δ 9.41 (s, 1H), 8.27 (d, *J* = 7.3 Hz, 2H), 7.83 (d, *J* = 8.6 Hz, 2H), 7.55 (dd, *J* = 10.0, 7.1 Hz, 3H), 2.43 (s, 6H). <sup>13</sup>C NMR (101 MHz, DMSO-*d*<sub>6</sub>) δ 150.43, 143.01 (d, *J* = 9.4 Hz), 141.33 (d, *J* = 11.1 Hz), 140.77, 140.55 (d, *J* = 10.8 Hz), 136.79, 130.55, 129.53 (d, *J* = 4.1 Hz), 128.54, 128.16, 127.66, 20.27 (d, *J* = 4.6 Hz). **MS** [EI, m/z]: 235.12 [M+H]<sup>+</sup>.

**(3p) 6,7-dichloro-2-phenylquinoxaline<sup>[1]</sup>**

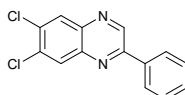

White solid (83.5 mg, 61%), <sup>1</sup>H NMR (400 MHz, DMSO-*d*<sub>6</sub>+CDCl<sub>3</sub>) δ 9.25 (d, *J* = 3.8 Hz, 1H), 8.19 (d, *J* = 3.8 Hz, 1H), 8.15 (d, *J* = 3.9 Hz, 1H), 8.12 (ddd, *J* = 7.7, 4.0, 2.0 Hz, 2H), 7.52 (dtd, *J* = 7.4, 4.9, 2.6 Hz, 3H). <sup>13</sup>C NMR (101 MHz, DMSO-*d*<sub>6</sub>+CDCl<sub>3</sub>) δ 152.55, 144.23, 141.01, 140.18, 135.86, 134.79, 133.87, 130.76, 130.12, 129.72, 129.23, 127.52. **MS** [EI, m/z]: 275.01 [M+H]<sup>+</sup>.

**(3q) 6,7-dibromo-2-phenylquinoxaline**<sup>[1]</sup>

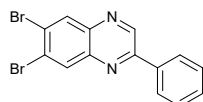

White solid (93.86 mg, 52%), <sup>1</sup>H NMR (400 MHz, CDCl<sub>3</sub>) δ 9.32 (s, 1H), 8.46 (s, 1H), 8.41 (s, 1H), 8.21 – 8.15 (m, 2H), 7.61 – 7.54 (m, 3H). <sup>13</sup>C NMR (101 MHz, CDCl<sub>3</sub>) δ 152.66, 144.37, 141.55, 140.75, 135.95, 133.62, 133.19, 130.82, 129.29, 127.59, 126.99, 125.99. **MS** [EI, m/z]: 364.90 [M+H]<sup>+</sup>.

**(3r) 6,7-dichloro-2-(p-tolyl)quinoxaline**<sup>[2], [7]</sup>

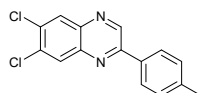

Yellow solid (97.15 mg, 67%), <sup>1</sup>H NMR (400 MHz, CDCl<sub>3</sub>) δ 9.18 (d, *J* = 1.2 Hz, 1H), 8.14 (d, *J* = 1.5 Hz, 1H), 8.10 (d, *J* = 1.4 Hz, 1H), 7.99 (d, *J* = 1.5 Hz, 1H), 7.97 (s, 1H), 7.29 (s, 1H), 7.27 (s, 1H), 2.37 (s, 3H). <sup>13</sup>C NMR (101 MHz, CDCl<sub>3</sub>) δ 151.52, 143.13, 140.21, 140.06, 139.05, 133.74, 132.63, 132.11, 129.04, 128.97, 128.68, 126.40, 20.45. **MS** [EI, m/z]: 290.02 [M+H]<sup>+</sup>.

**(3s) 6,7-dibromo-2-(p-tolyl)quinoxaline**<sup>[2], [7]</sup>

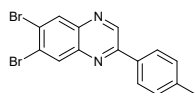

White solid (107.98 mg, 57%), <sup>1</sup>H NMR (400 MHz, CDCl<sub>3</sub>) δ 9.17 (s, 1H), 8.32 (s, 1H), 8.28 (s, 1H), 7.97 (d, *J* = 1.9 Hz, 1H), 7.96 (d, *J* = 1.9 Hz, 1H), 7.27 (s, 1H), 7.25 (s, 1H), 2.36 (s, 3H). <sup>13</sup>C NMR (101 MHz, CDCl<sub>3</sub>) δ 151.51, 143.21, 140.51, 140.23, 139.54, 132.46, 132.08, 128.96, 126.39, 125.77, 124.57, 20.47. **MS** [EI, m/z]: 378.90 [M+H]<sup>+</sup>.

**(3t) 6,7-dimethyl-2-(3-nitrophenyl)quinoxaline**<sup>[2], [8]</sup>

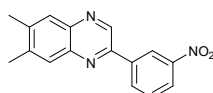

White solid (81.20 mg, 58%), <sup>1</sup>H NMR (400 MHz, CDCl<sub>3</sub>) δ 9.18 (s, 1H), 8.98 (t, *J* = 2.0 Hz, 1H), 8.43 (dt, *J* = 7.9, 1.4 Hz, 1H), 8.26 (ddd, *J* = 8.2, 2.3, 1.1 Hz, 1H), 7.84 (s, 1H), 7.81 (s, 1H), 7.65 (t, *J* = 8.0 Hz, 1H), 2.45 (d, *J* = 1.2 Hz, 6H). <sup>13</sup>C NMR (101 MHz, CDCl<sub>3</sub>) δ 147.93, 147.19, 140.63, 140.41, 140.32, 140.13, 139.85, 137.75, 131.84, 129.04, 127.66, 127.06, 123.29, 121.22, 19.43 (d, *J* = 2.1 Hz).

**MS** [EI, m/z]: 279.99 [M+H]<sup>+</sup>.

**(3u) 6,7-dimethyl-2-(p-tolyl)quinoxaline**<sup>[2], [8]</sup>

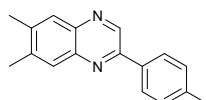

White solid (103.38 mg, 83%), <sup>1</sup>H NMR (400 MHz, CDCl<sub>3</sub>) δ 9.07 (s, 1H), 8.04 (d, *J* = 2.1 Hz, 1H), 8.02 (d, *J* = 2.1 Hz, 1H), 7.75 (s, 1H), 7.72 (s, 1H), 6.97 (d, *J* = 2.1 Hz, 1H), 6.95 (d, *J* = 2.1 Hz, 1H), 3.78 (s, 3H), 2.38 (t, *J* = 1.2 Hz, 6H). <sup>13</sup>C NMR (101 MHz, CDCl<sub>3</sub>) δ 161.20, 150.59, 142.04, 141.19, 140.66, 140.11, 139.57, 129.62, 128.75, 128.45, 128.09, 114.50, 55.41, 20.34 (d, *J* = 7.1 Hz). **MS** [EI, m/z]: 249.13 [M+H]<sup>+</sup>.

**(3v) 3-phenylpyrido[2,3-b]pyrazine and 2-phenylpyrido[2,3-b]pyrazine**<sup>[6]</sup>

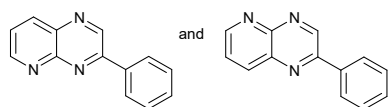

White solid (69.3 mg, 67%),  $^1\text{H}$  NMR (400 MHz,  $\text{DMSO-}d_6$ )  $\delta$  9.69 (d,  $J = 26.8$  Hz, 1H), 9.14 (ddd,  $J = 15.6, 4.2, 1.9$  Hz, 1H), 8.52 (ddd,  $J = 8.3, 4.3, 1.9$  Hz, 1H), 8.40 – 8.25 (m, 2H), 7.91 – 7.77 (m, 1H), 7.58 (dddd,  $J = 10.8, 7.8, 5.3, 3.4$  Hz, 3H).  $^{13}\text{C}$  NMR (101 MHz,  $\text{DMSO-}d_6$ )  $\delta$  155.09, 154.14, 154.05, 152.28, 150.47, 150.32, 146.96, 145.20, 138.72, 138.36, 137.19, 136.82, 135.99, 135.81, 131.42, 131.19, 129.63, 129.59, 128.31, 128.09, 126.61, 125.79. **MS** [EI,  $m/z$ ]: 208.08 [M+H] $^+$ .

## 6. References

1. K. S. Vadagaonkar, H. P. Kalmode, K. Murugan and A. C. Chaskar, *RSC Adv.*, 2015, 5, 5580–5590.
2. K. B. Harsha and K. S. Rangappa, *RSC Adv.*, 2016, 6, 57154–57162.
3. K. K. Durga Rao Viswanadham, M. Prathap Reddy, P. Sathyanarayana, O. Ravi, R. Kantc and S. R. Bathula, *Chem. Commun.*, 2014, 50, 13517–13520.
4. Y. Yang, K. Niedermann, C. Han, and S. L. Buchwald, *Org. Lett.*, 2014, 16, 4638–4641.
5. M. Wang, Y. Zhang, X. Yang and P. Sun, *Org. Biomol. Chem.*, 2022, 20, 2467–2472.
6. H. M. Meshram, G. S. Kumar, P. Ramesh, B. C. Reddy, *Tetrahedron Lett.*, 2010, 51 2580–2585.
7. K. Gopalaiah, A. Saini, S. N. Chandrudu, D. C. Rao, H. Yadav and B. Kumar, *Org. Biomol. Chem.*, 2017,15, 2259-226.
8. X.-T. Wang, J.-L. Song, M. Zhong, H.-J. Kang, H. X., T. Che, B. Shu, D. Peng, L. Zhang, S.-S. Zhang, *Eur. J. Org. Chem.*, 2020, 2020, 3635-3639.



## 7. $^1\text{H}$ NMR and $^{13}\text{C}$ NMR spectra for the products

3a

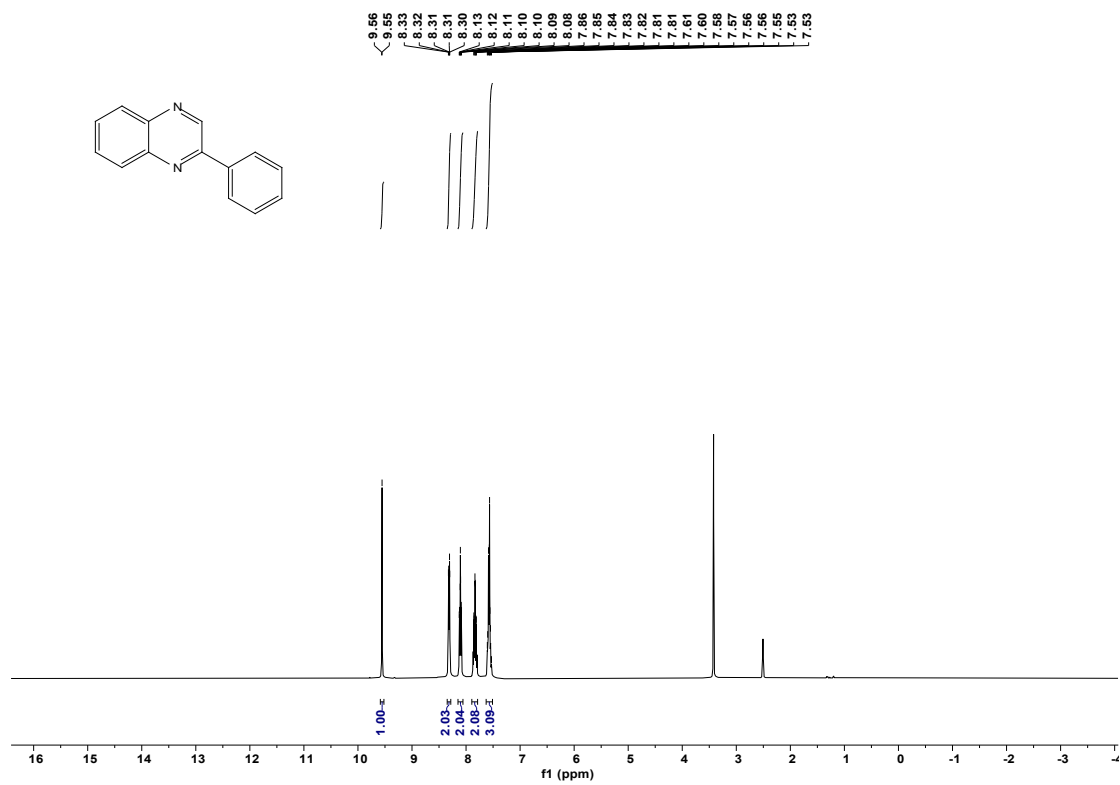

Z

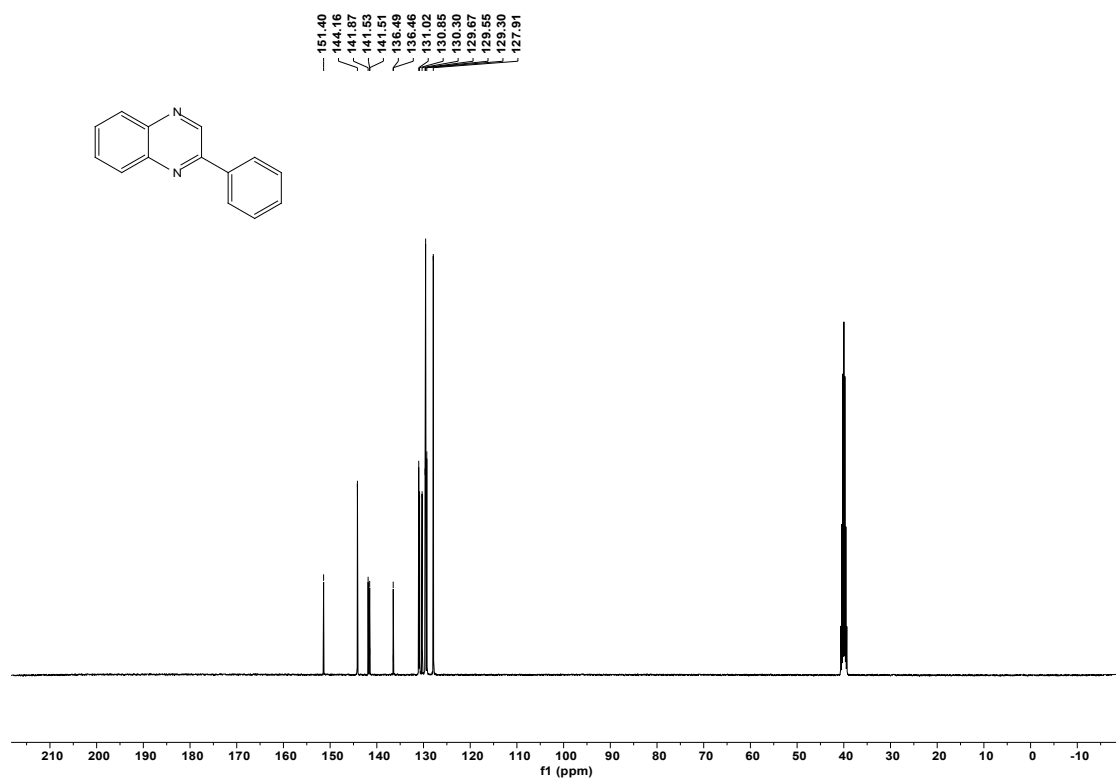

3b

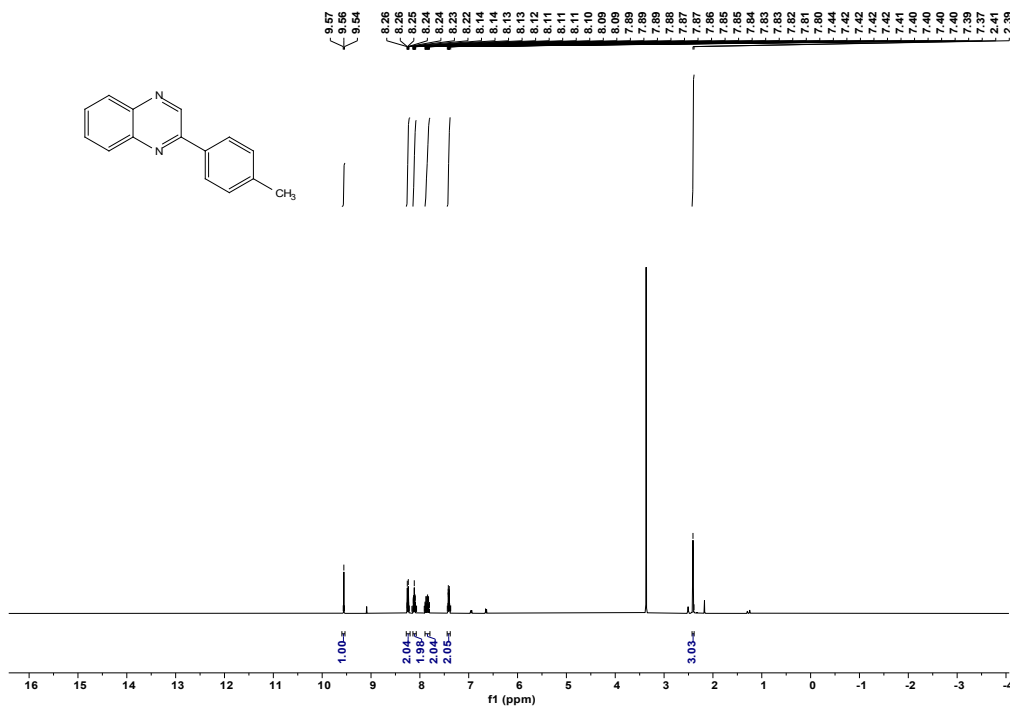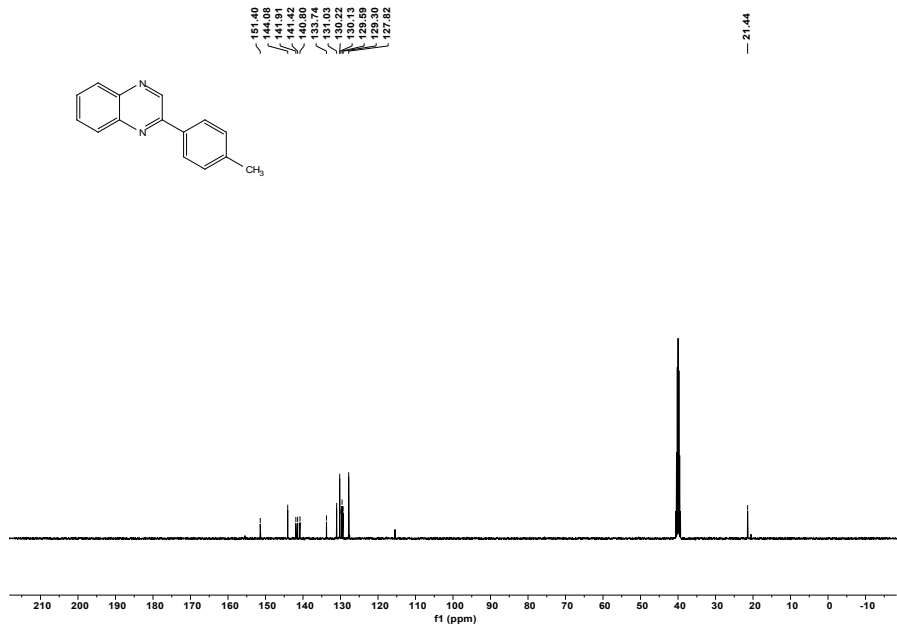

3c

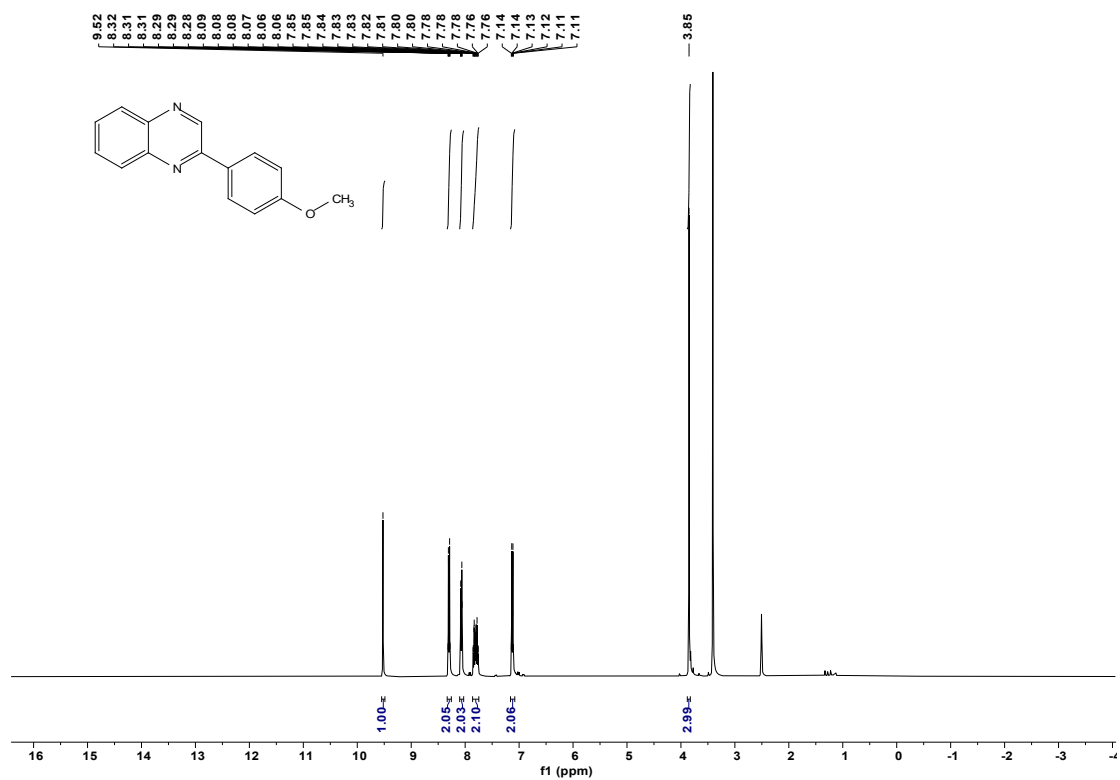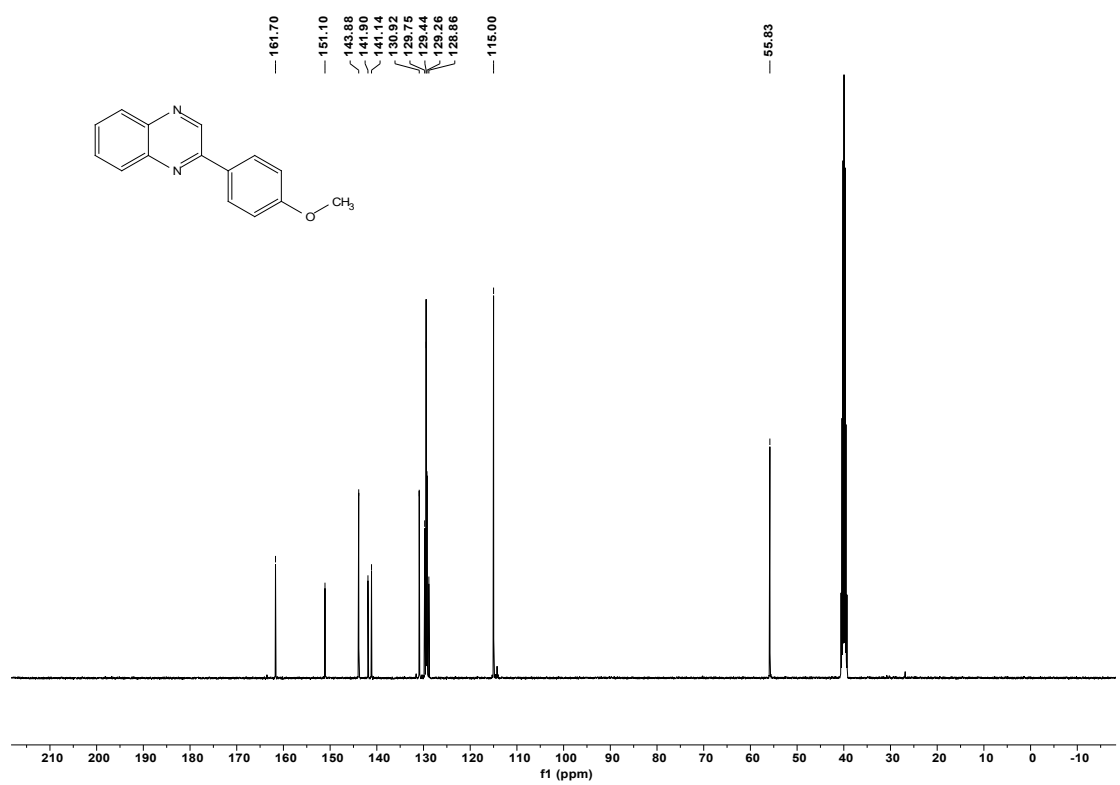

3d

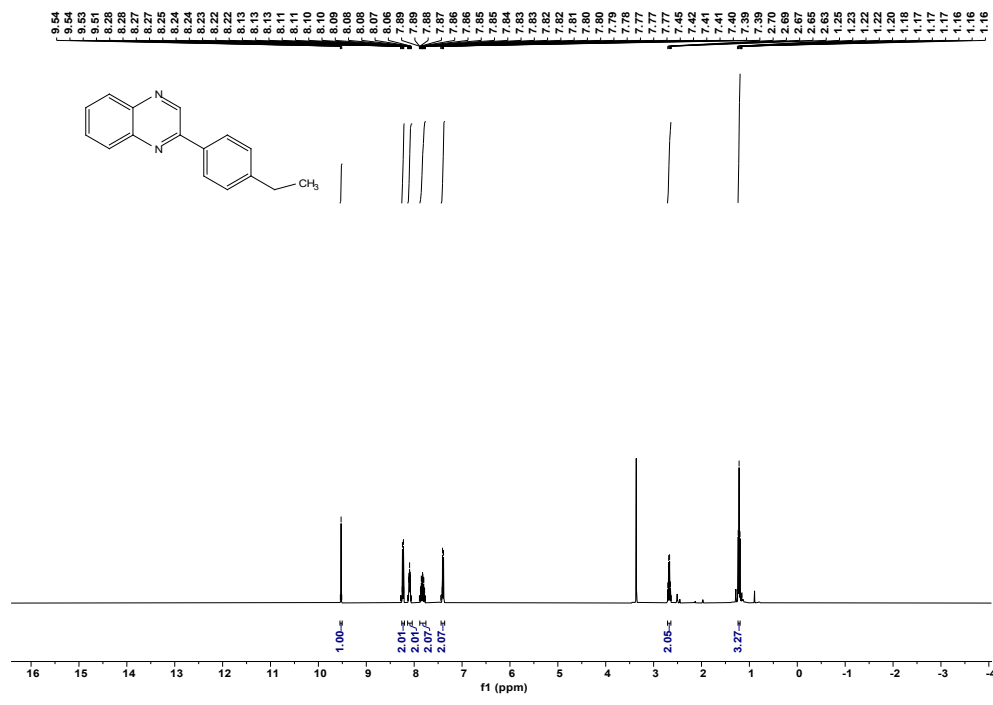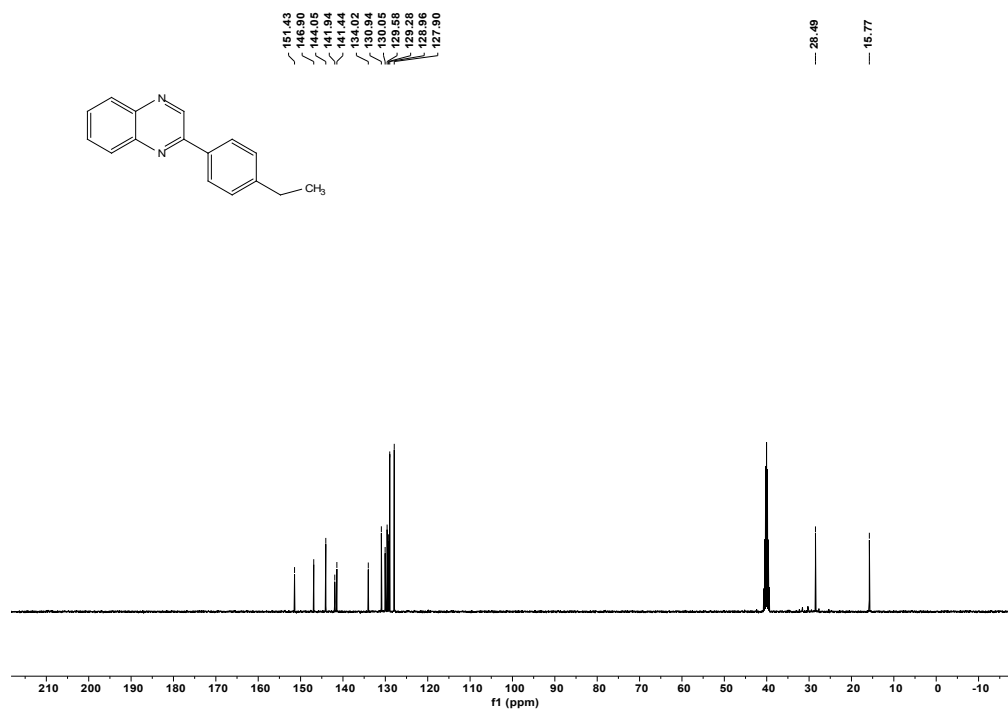

3e

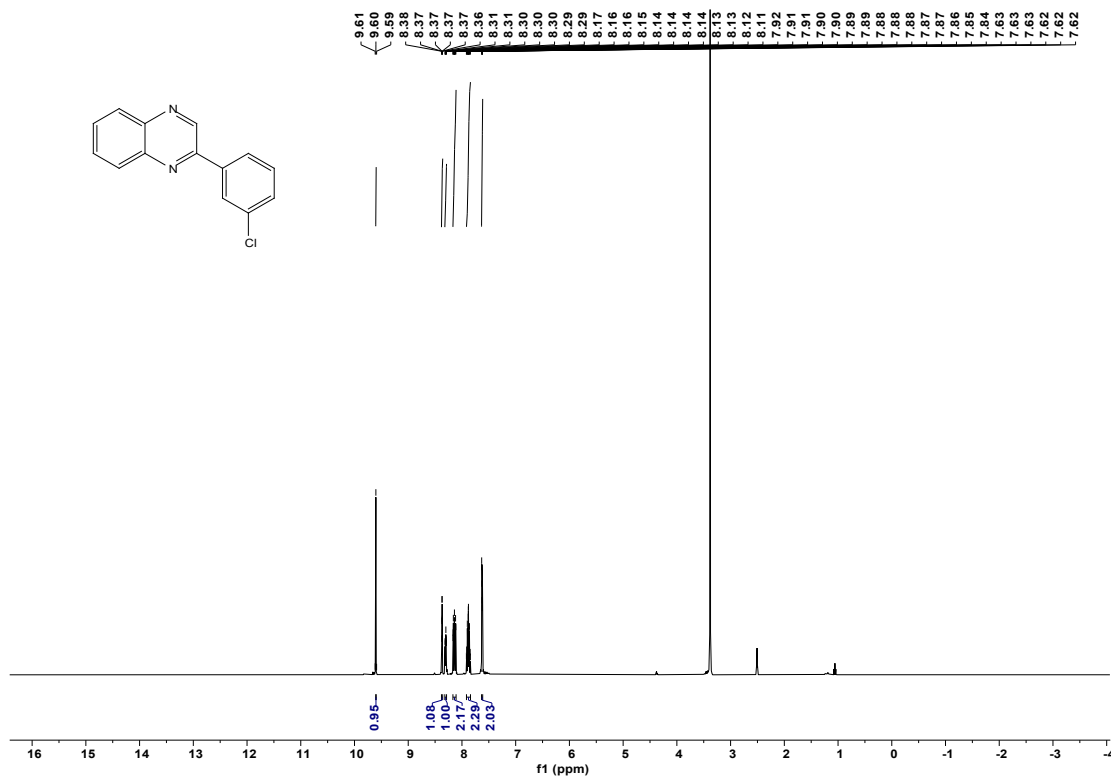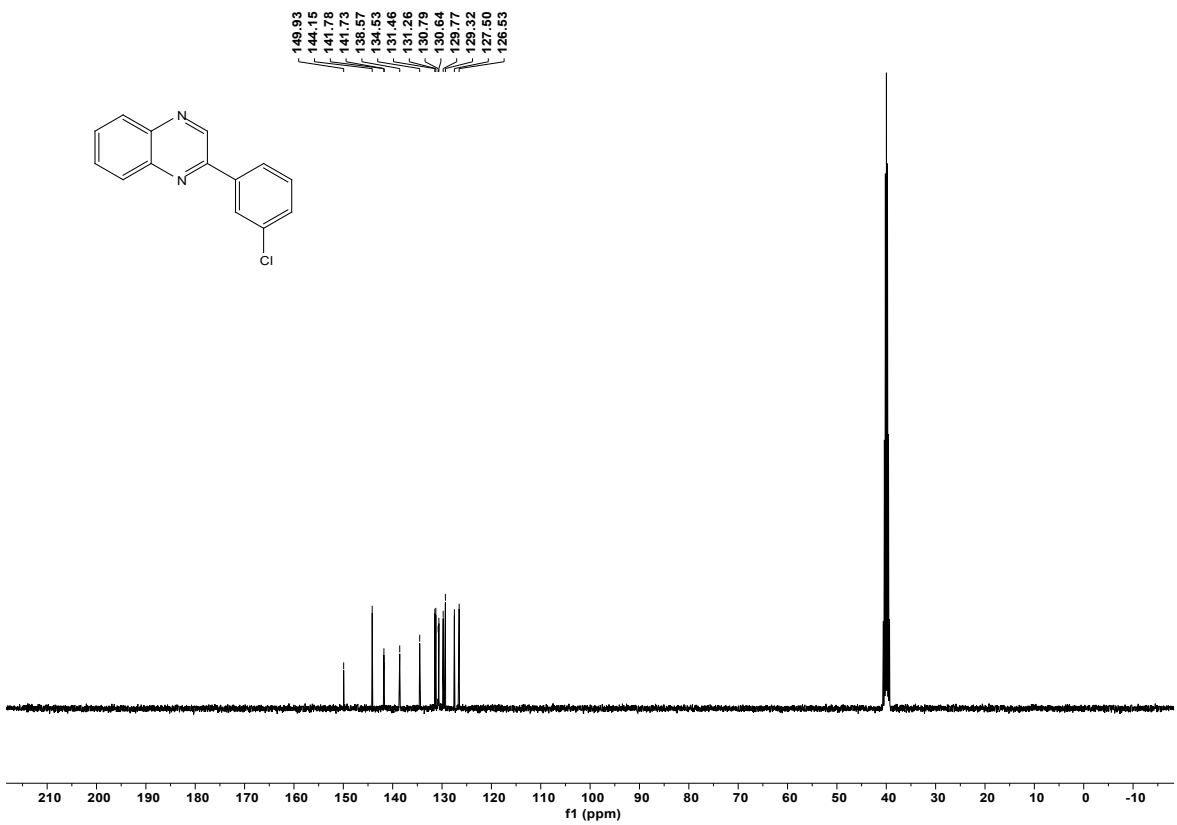

3f

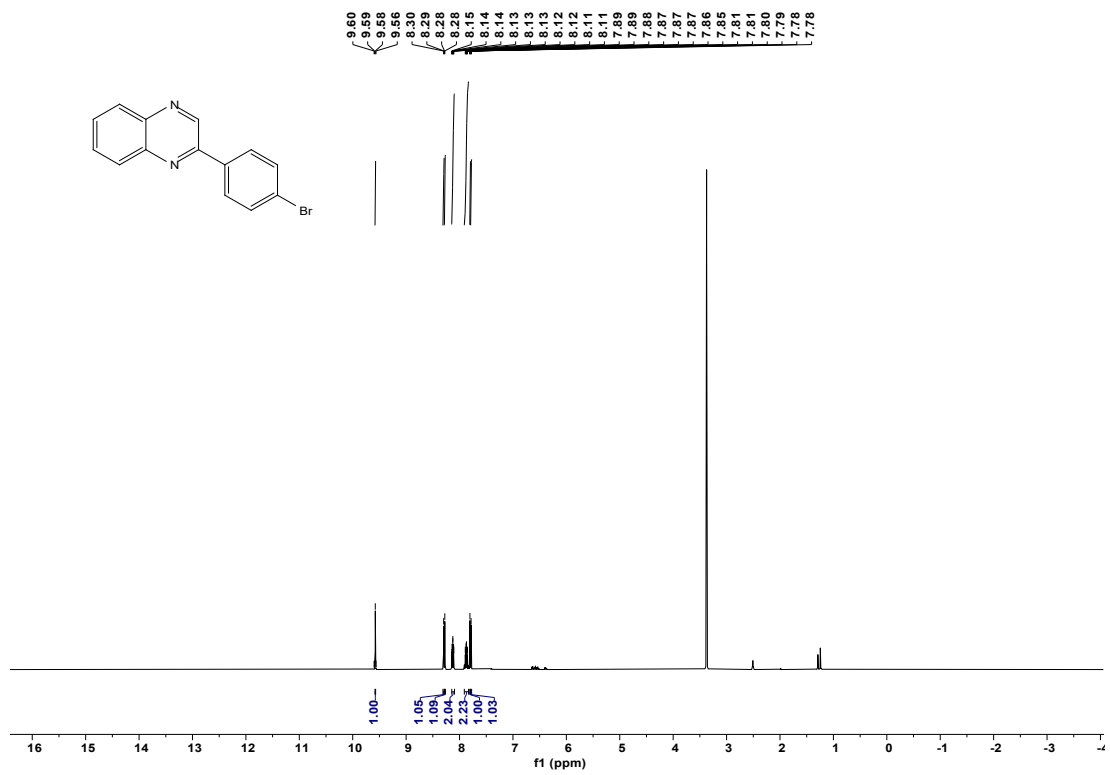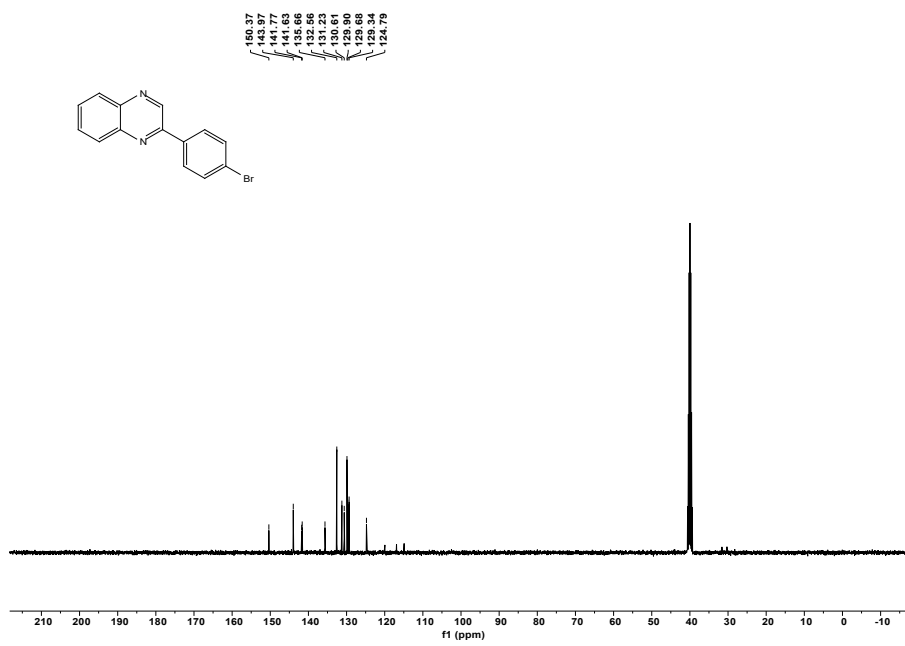

3g

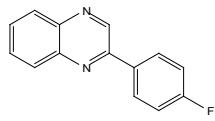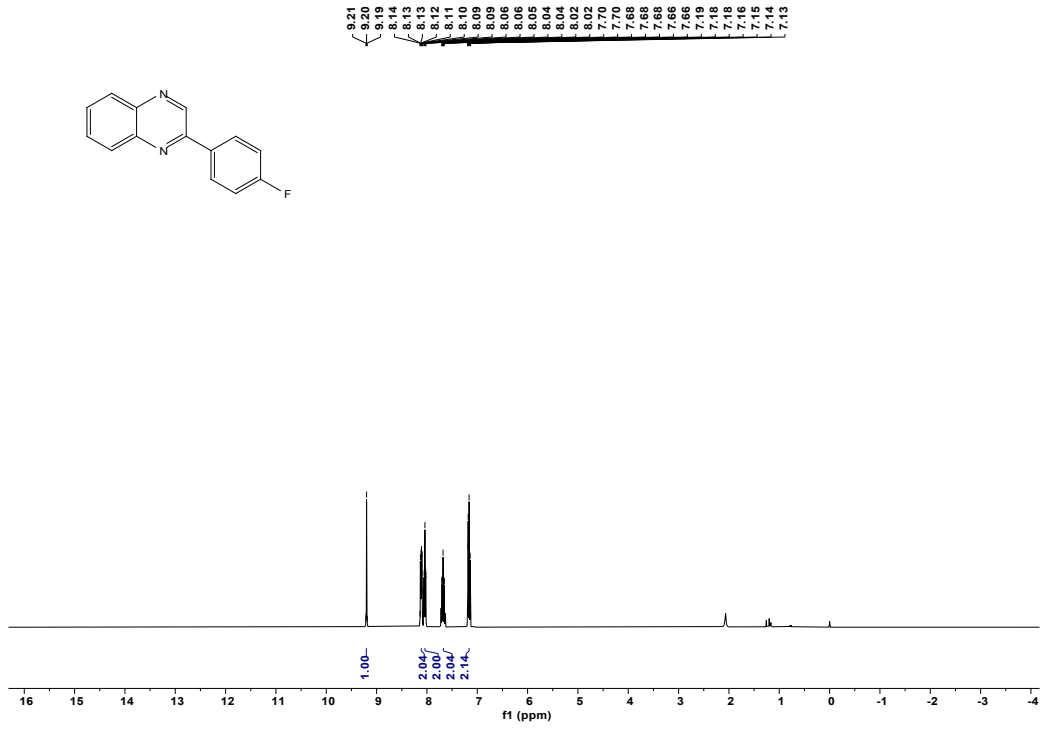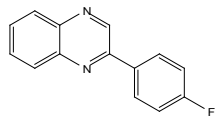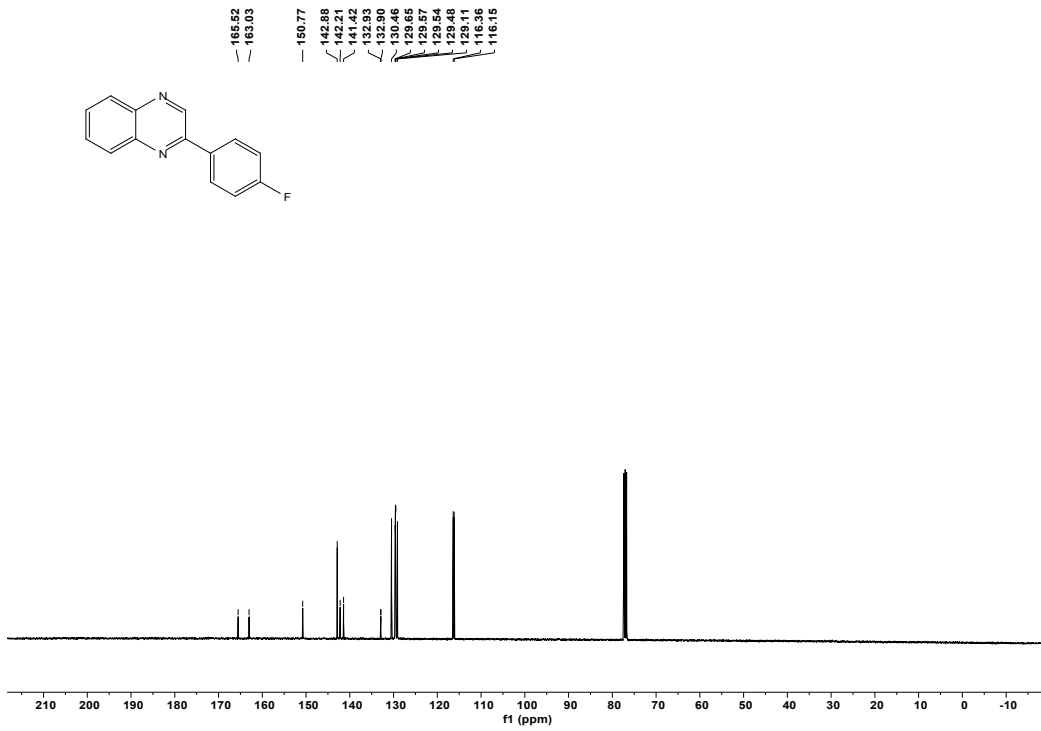

3h

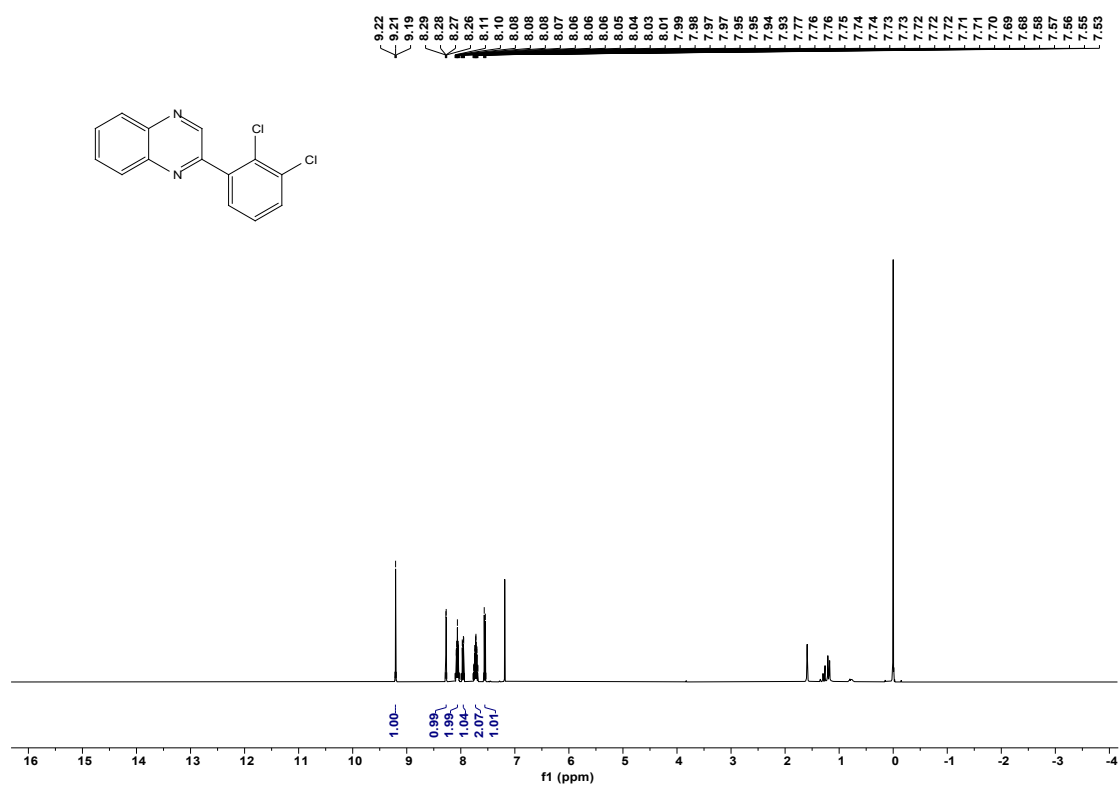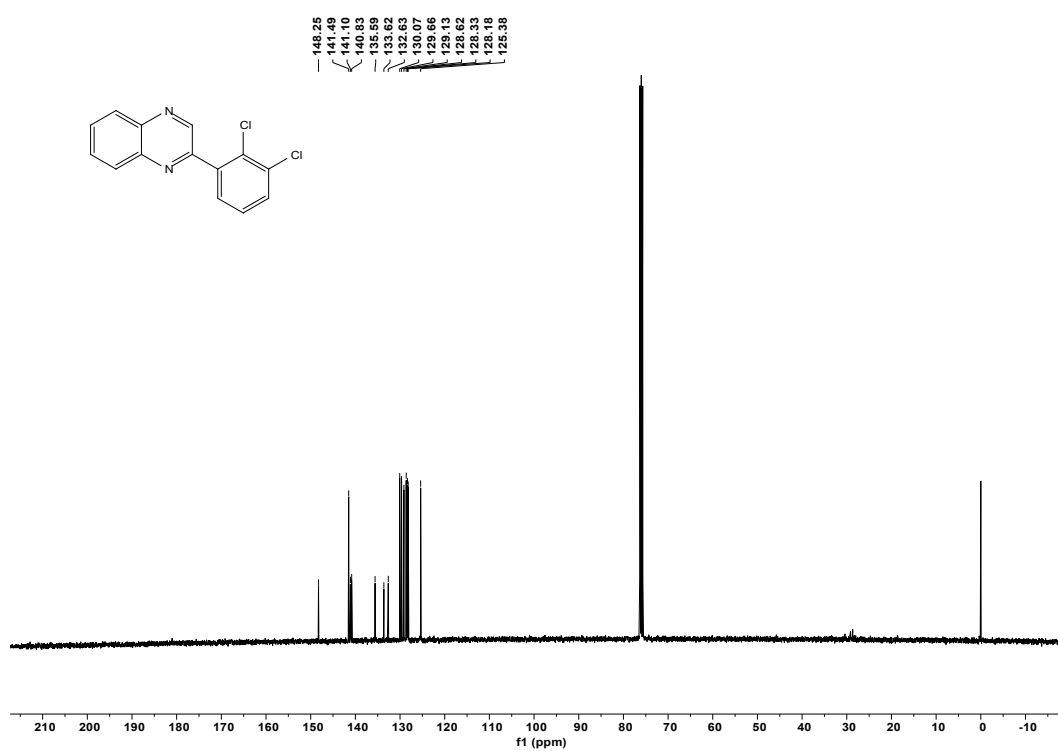



3i

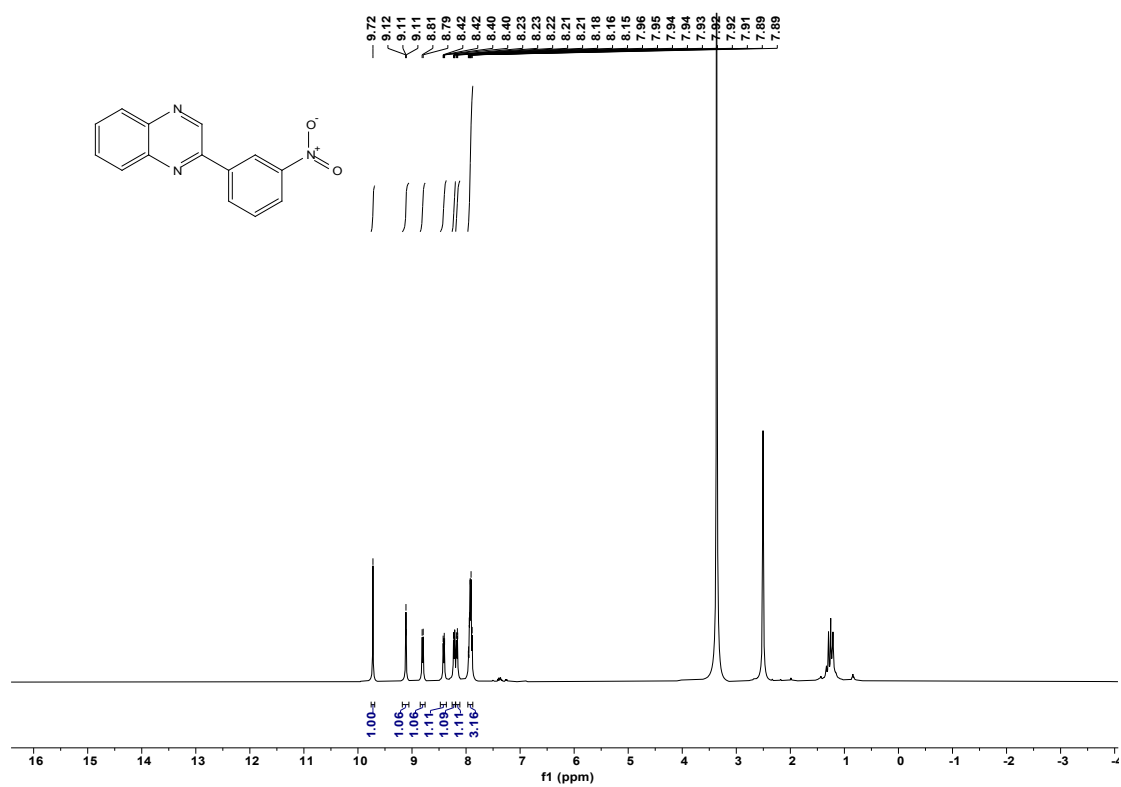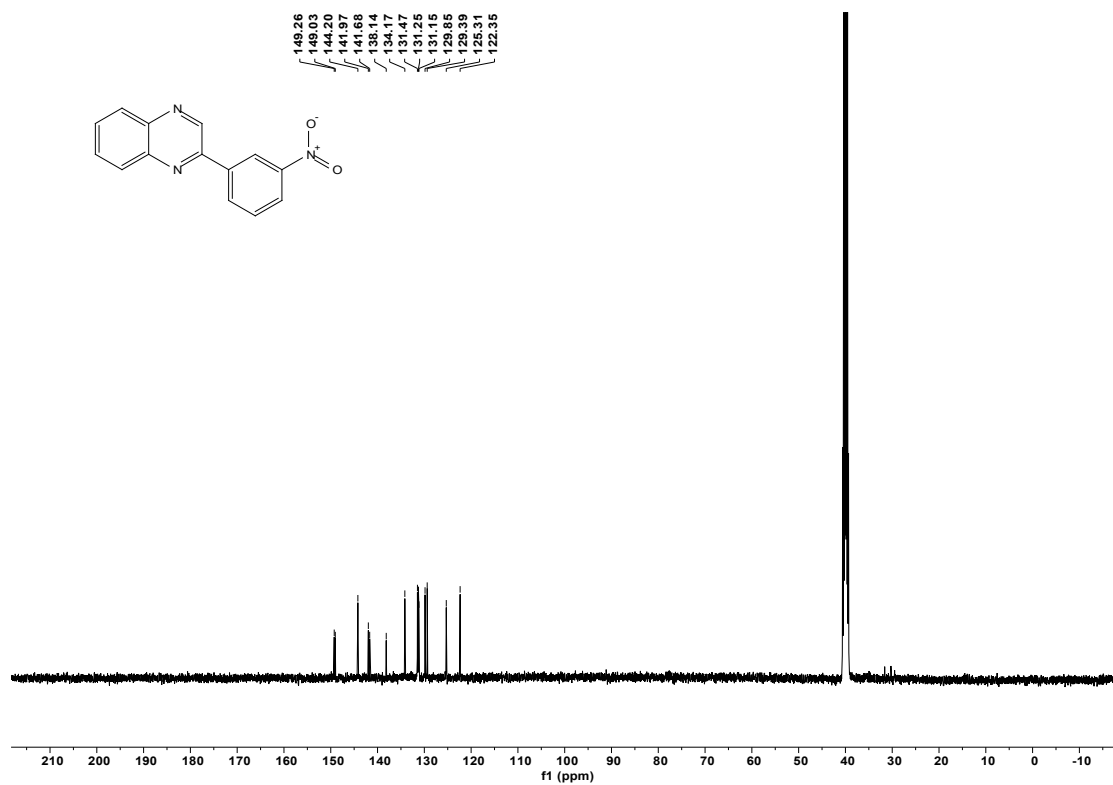

3j

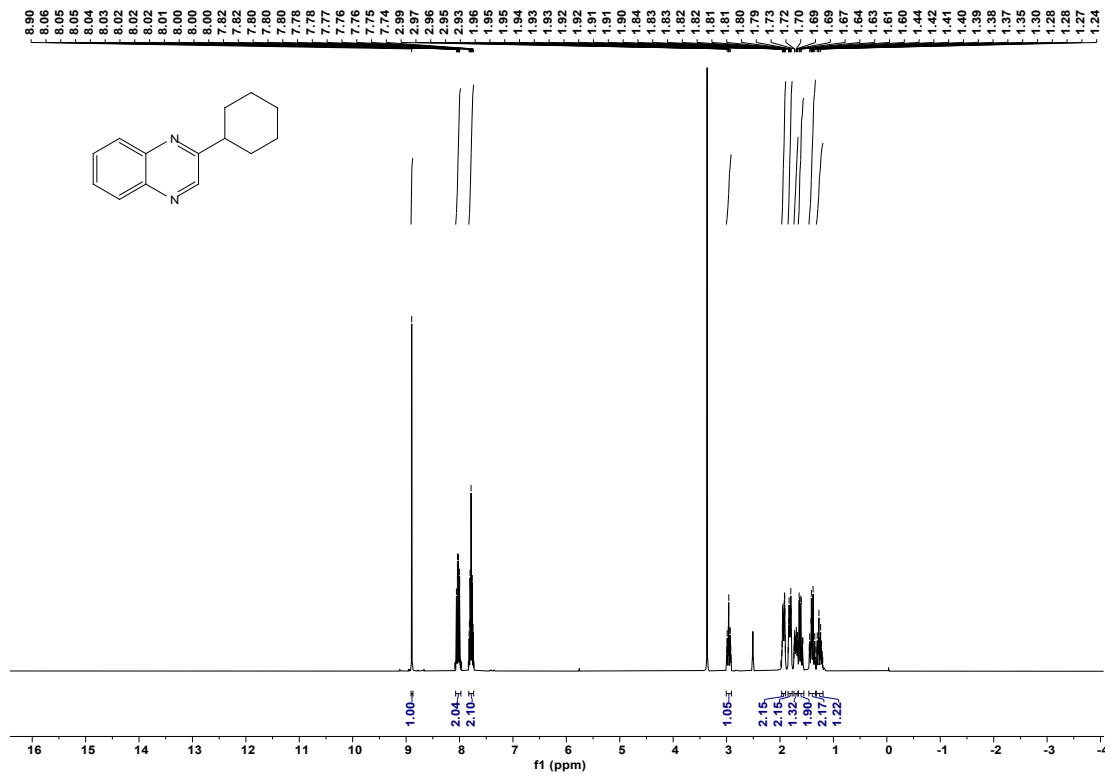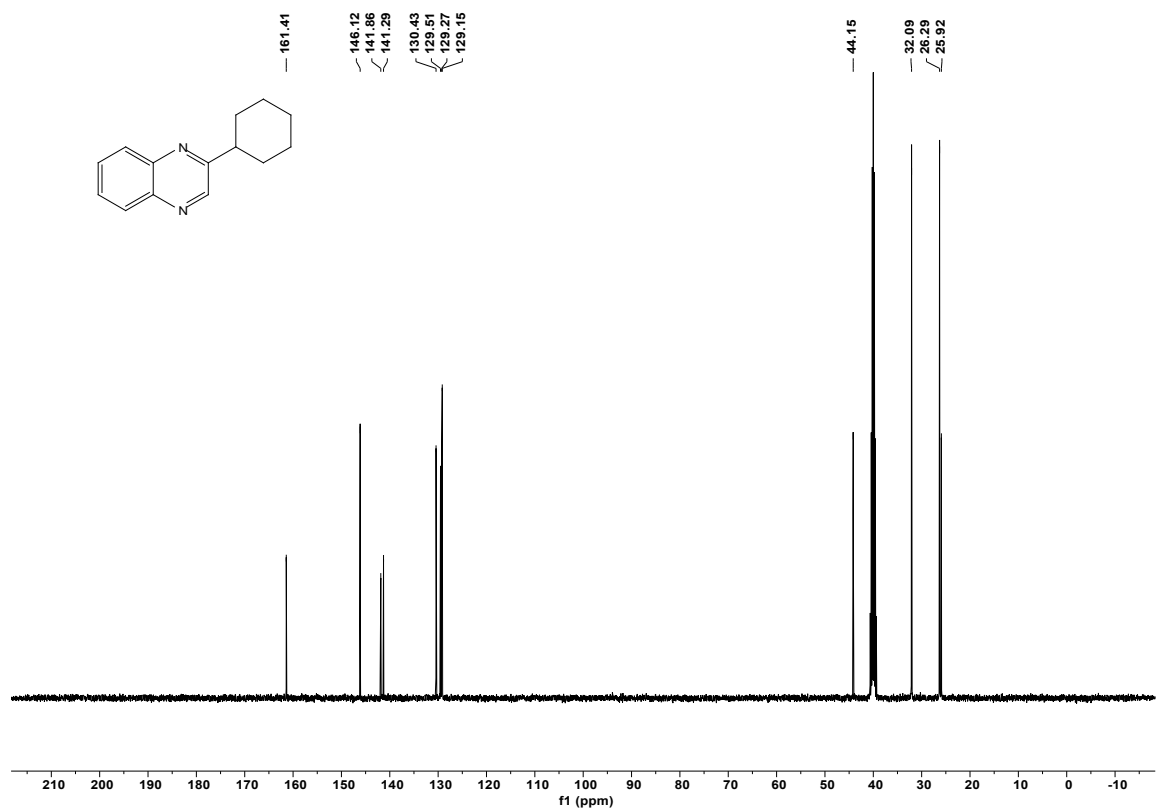

3k

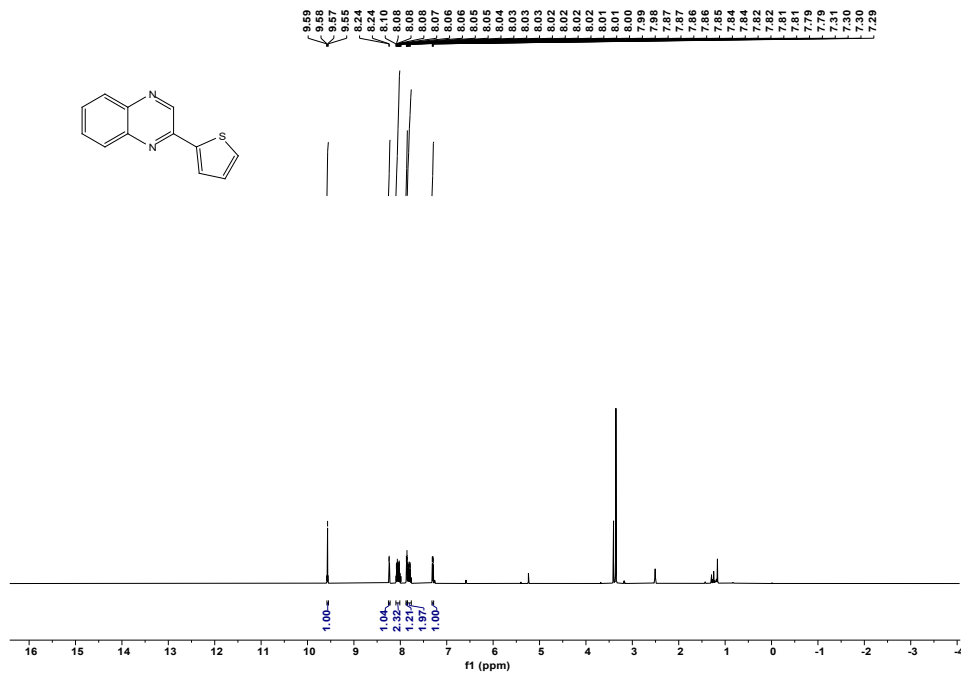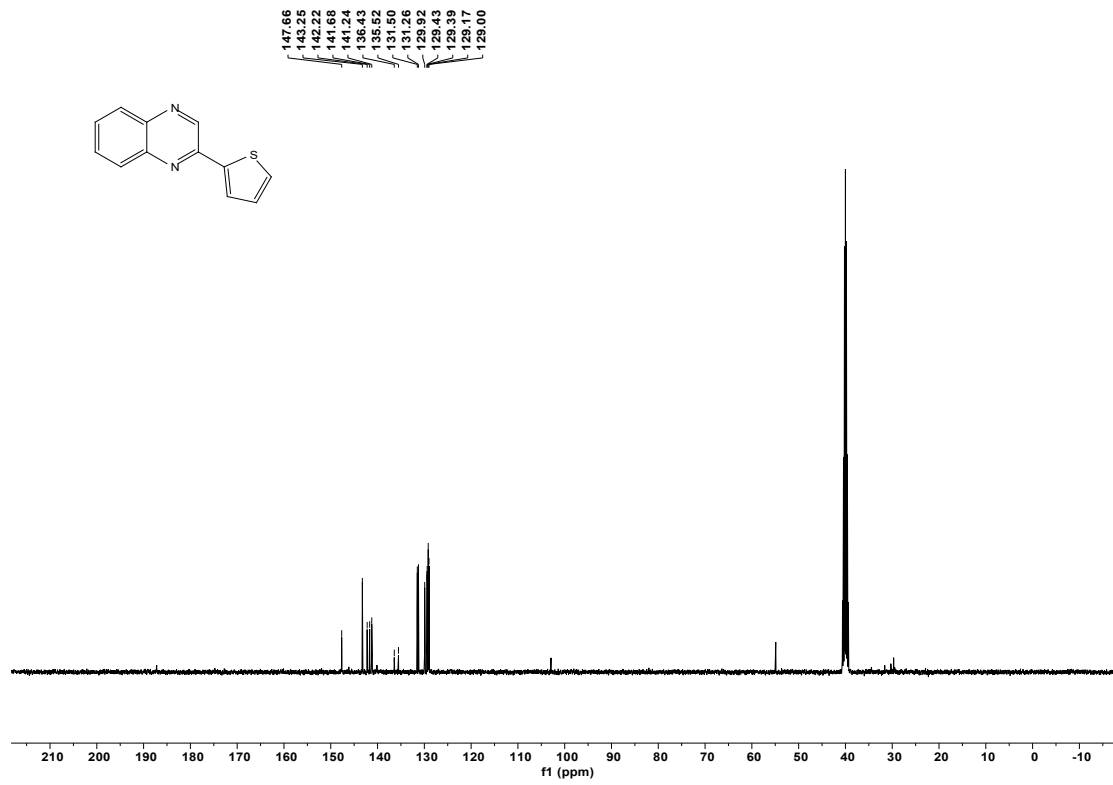

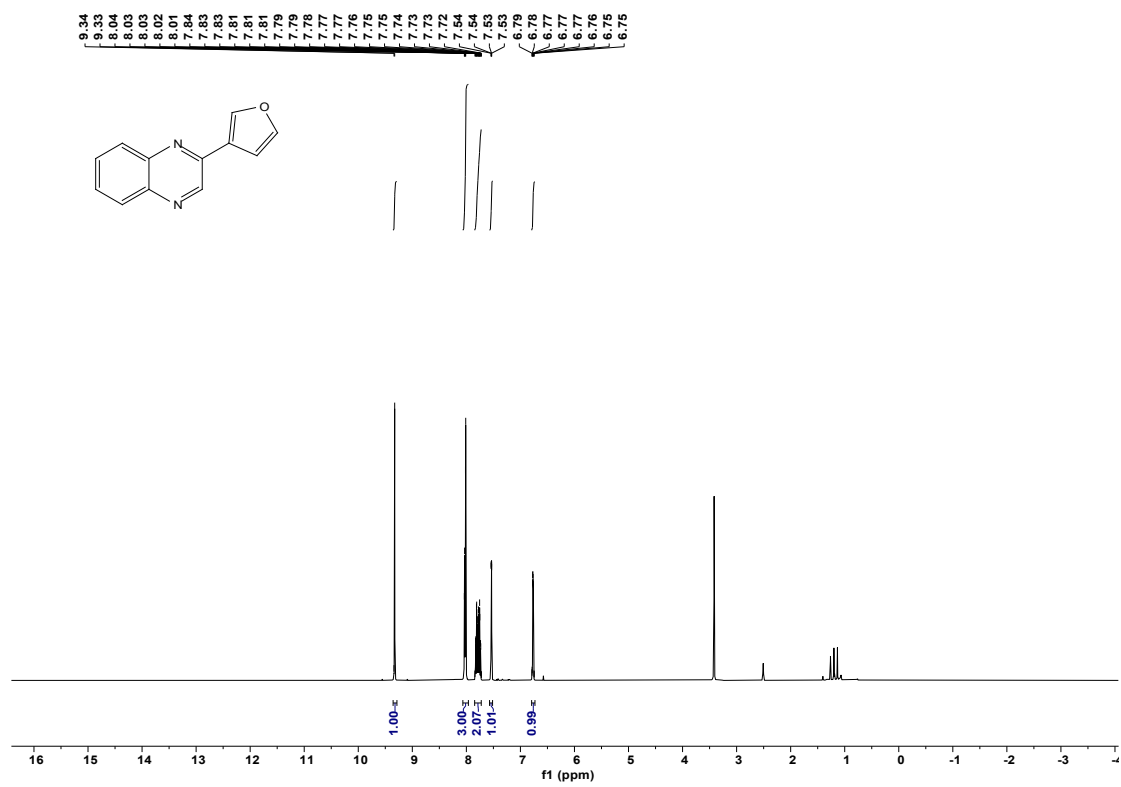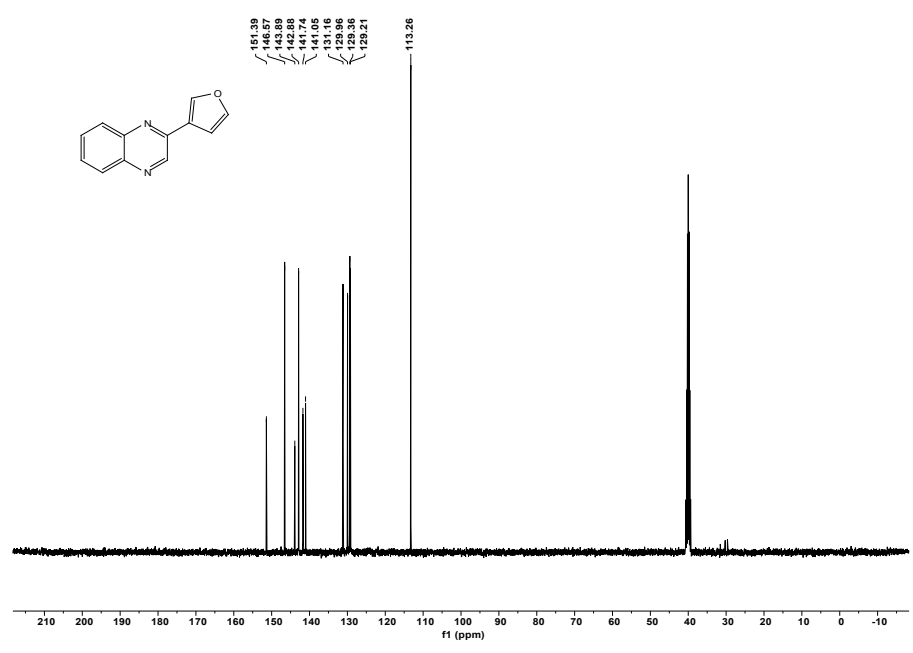

3m

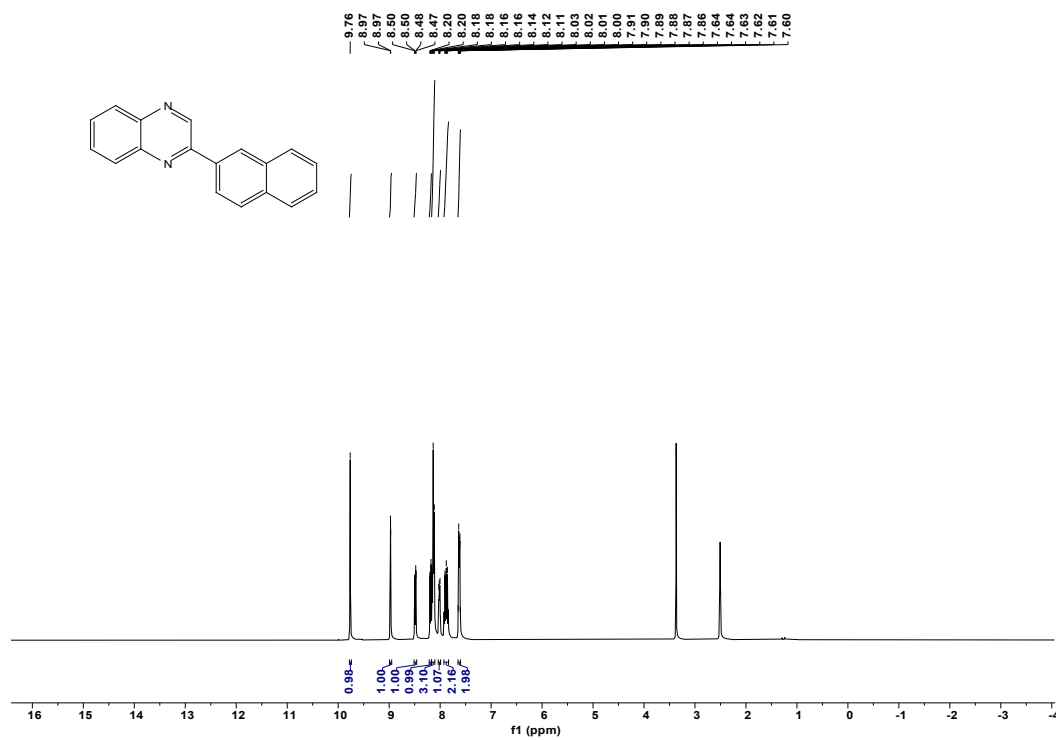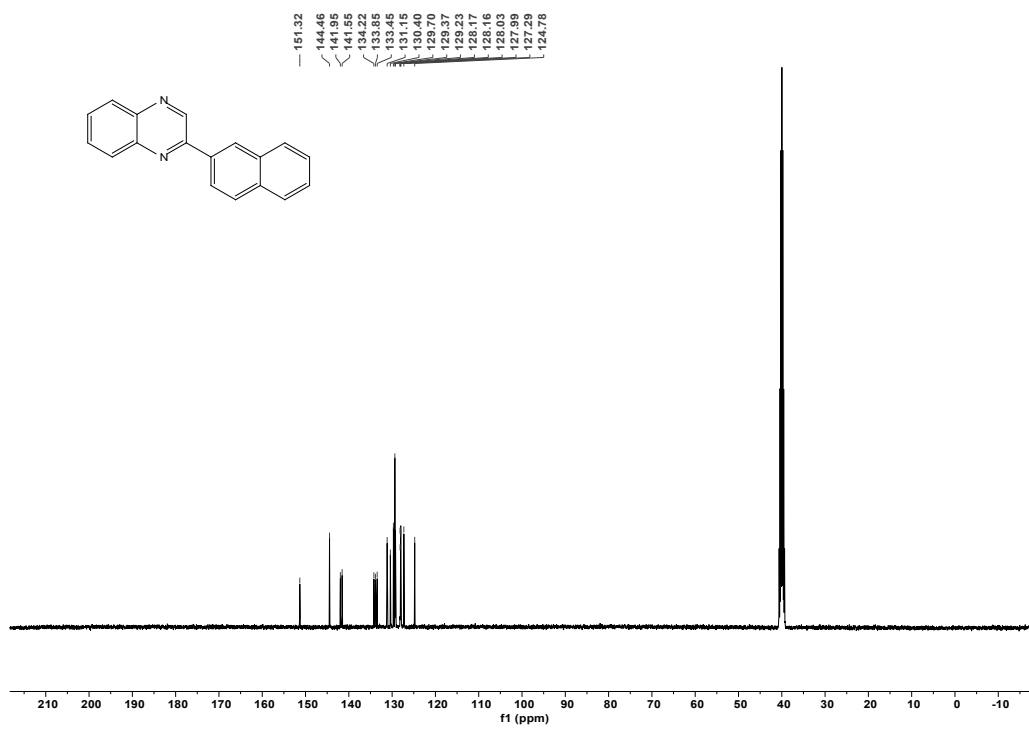

3n

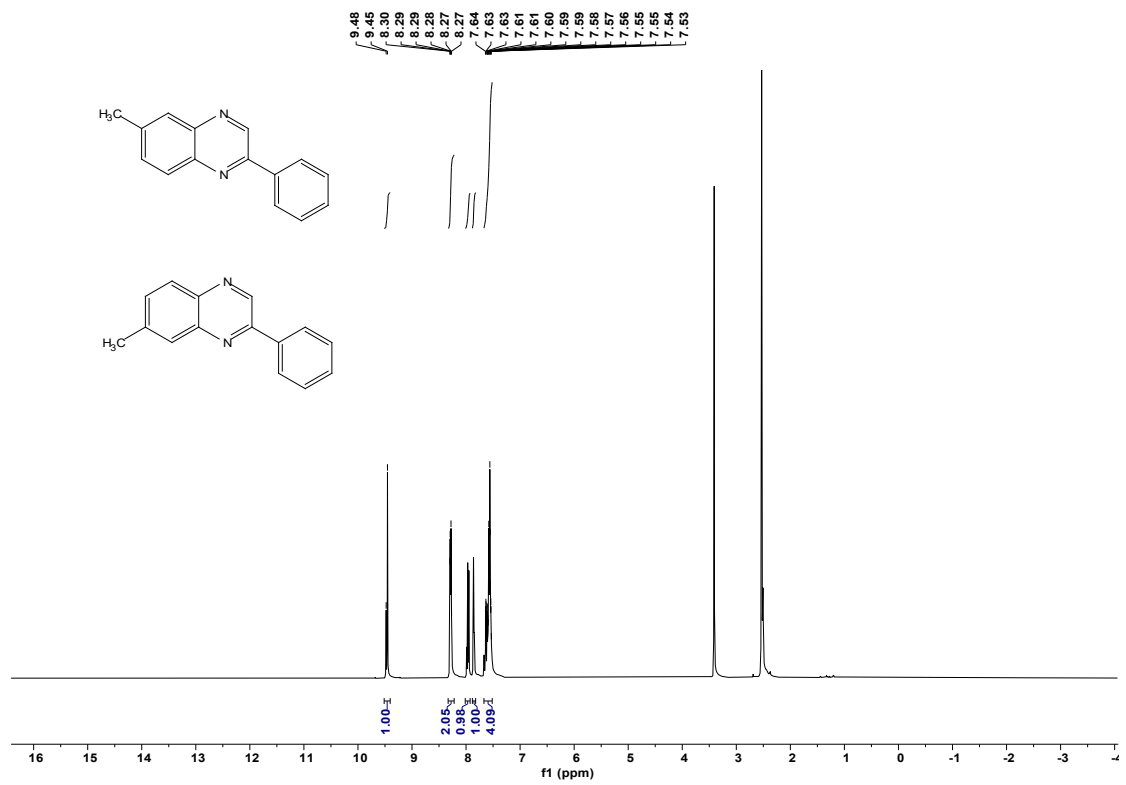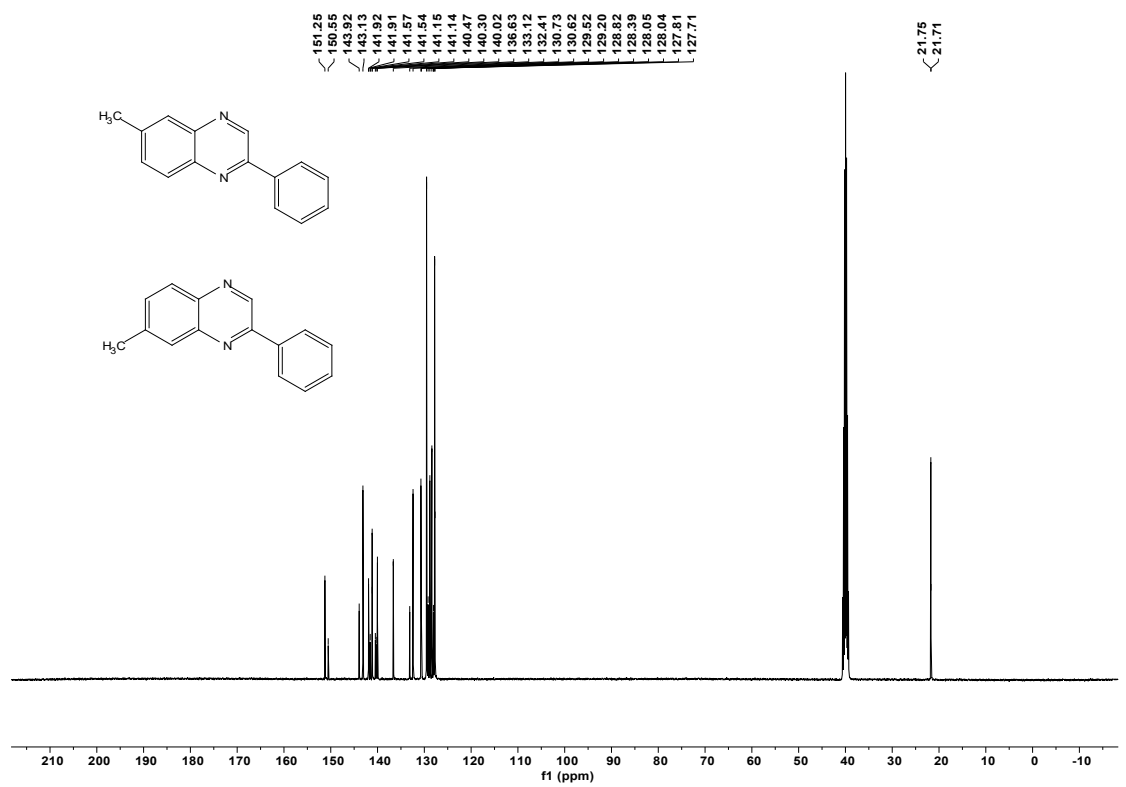

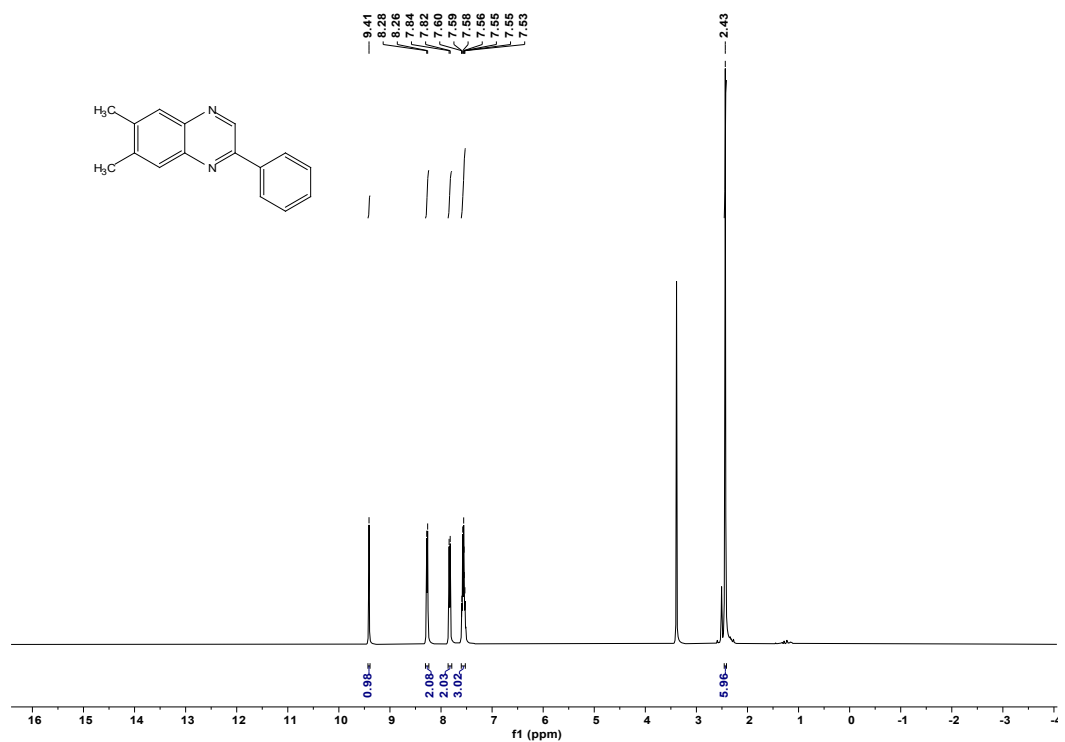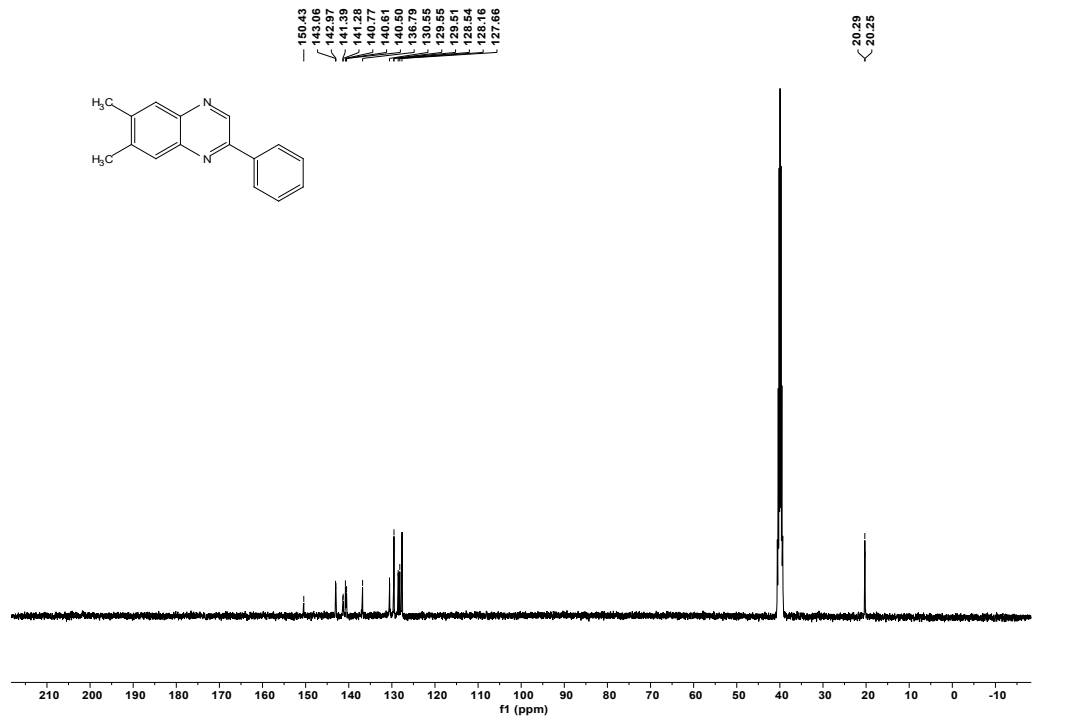

3p

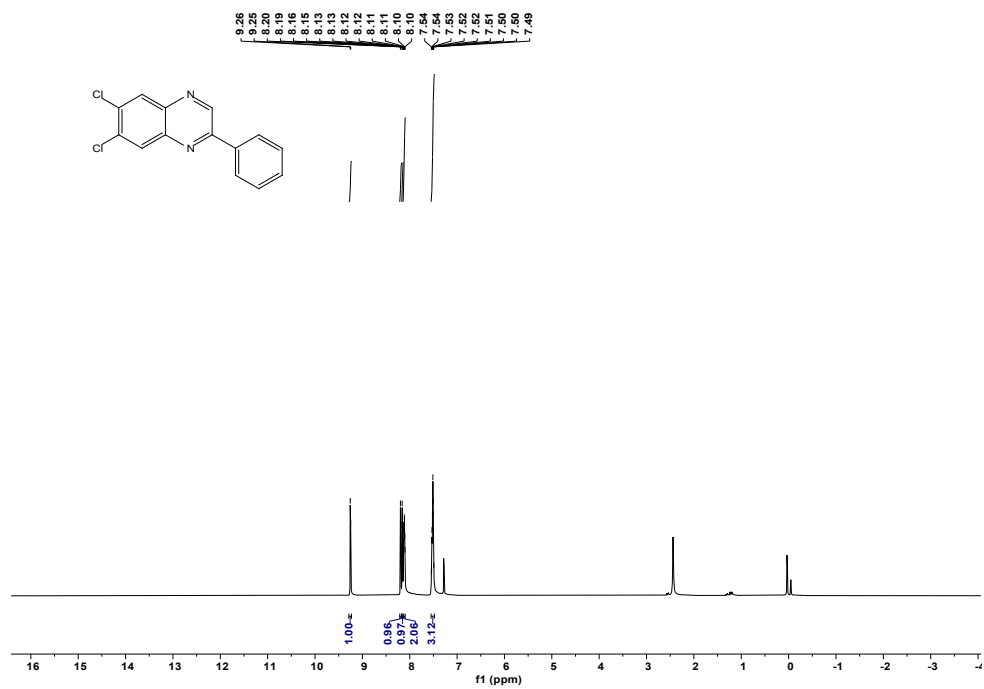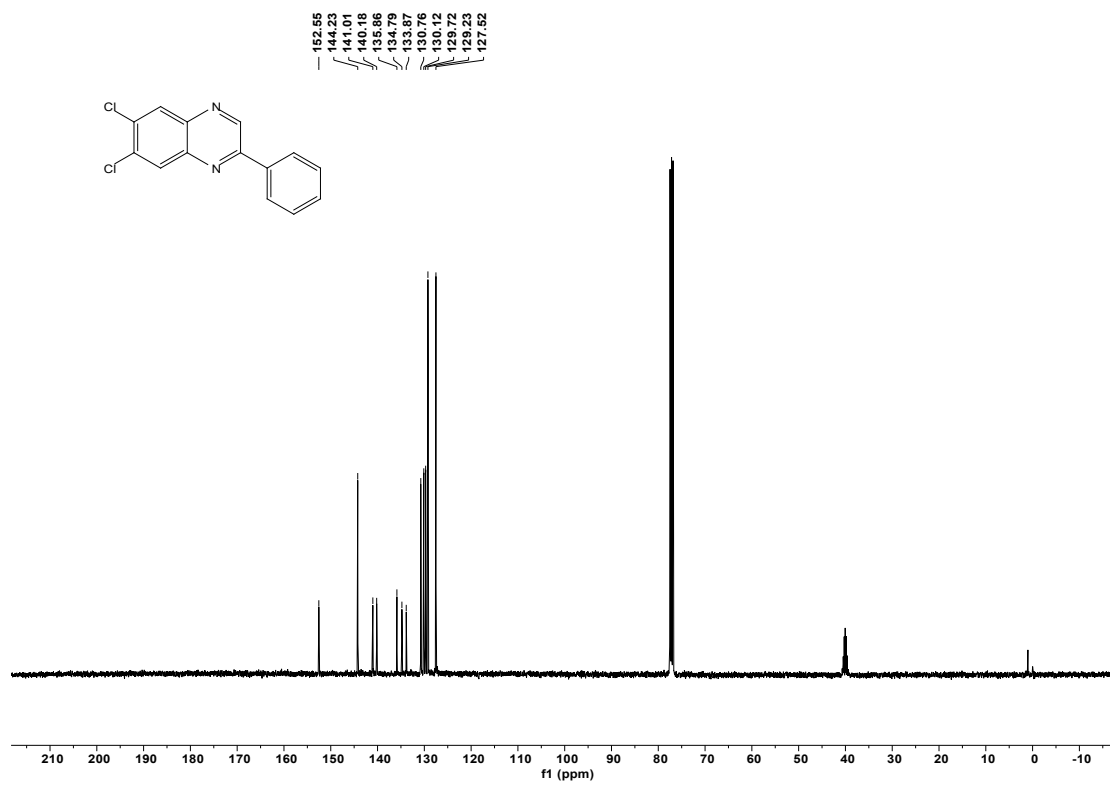



3q

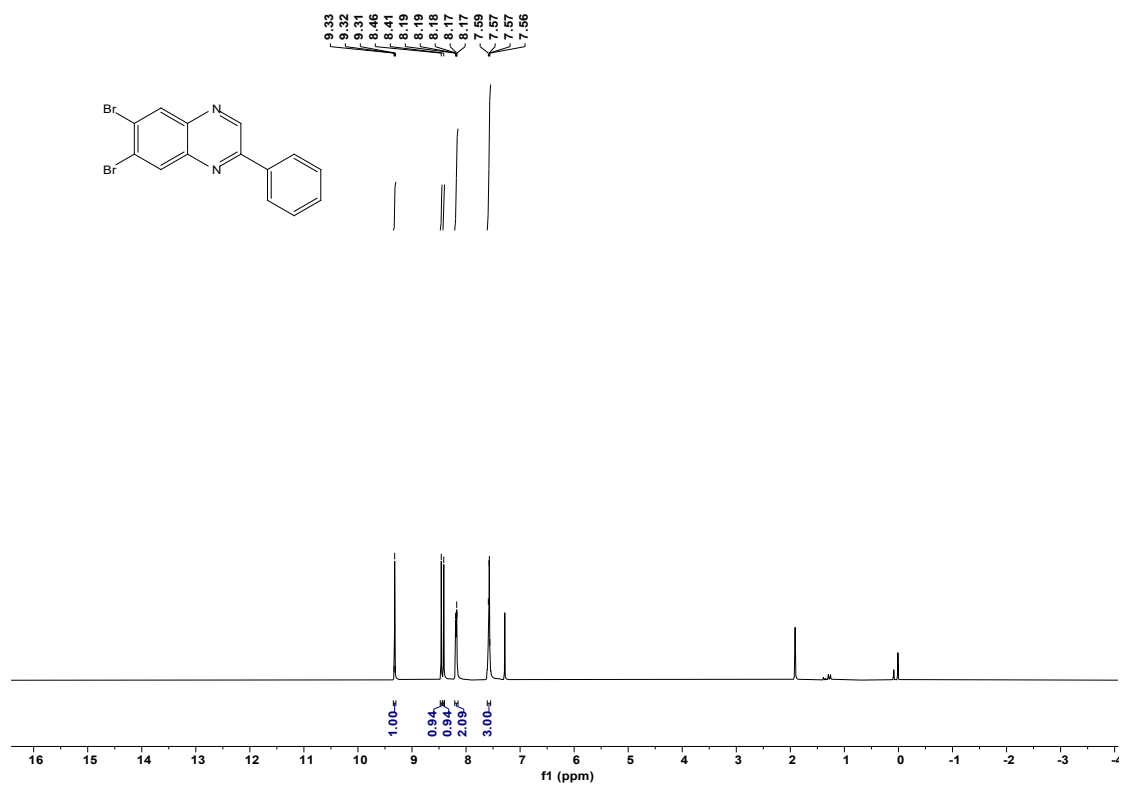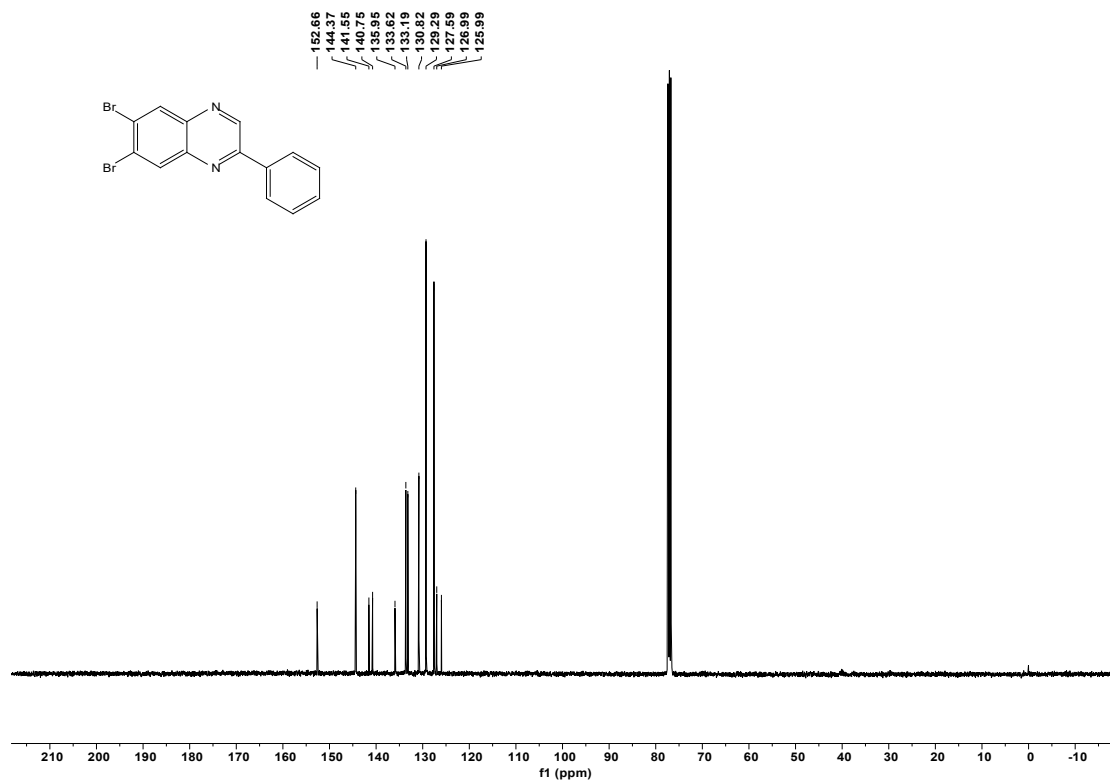

3r

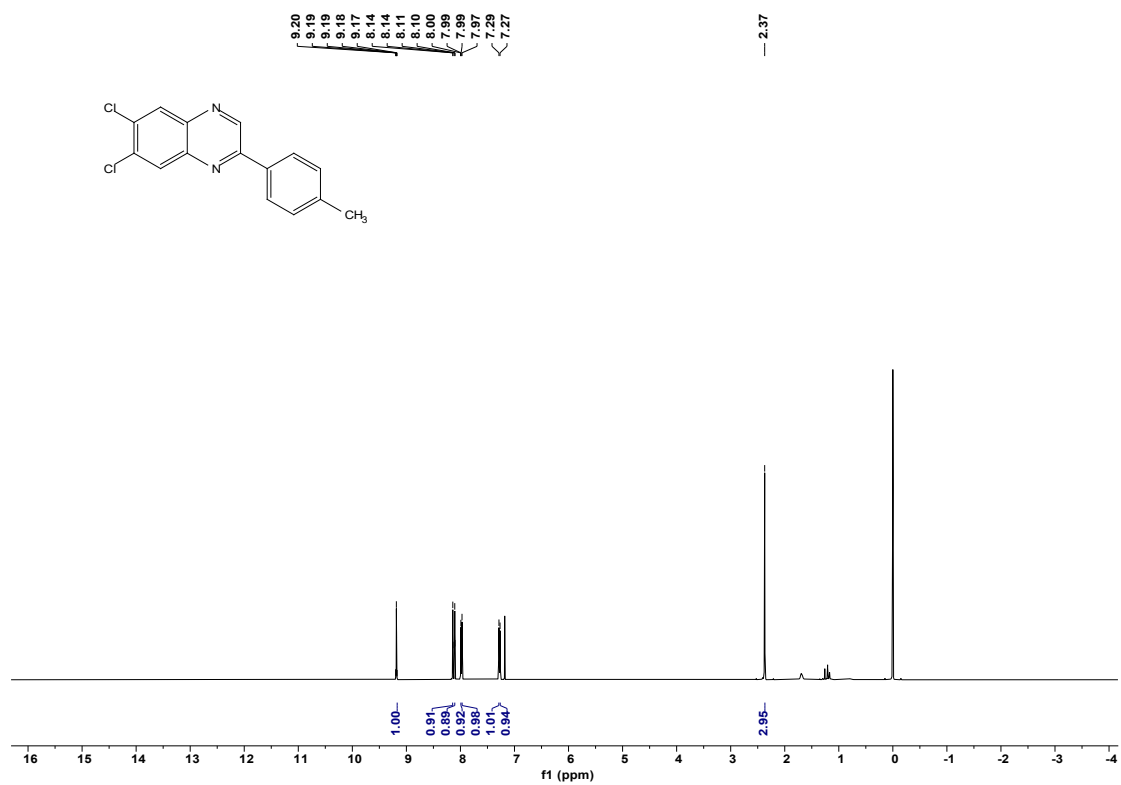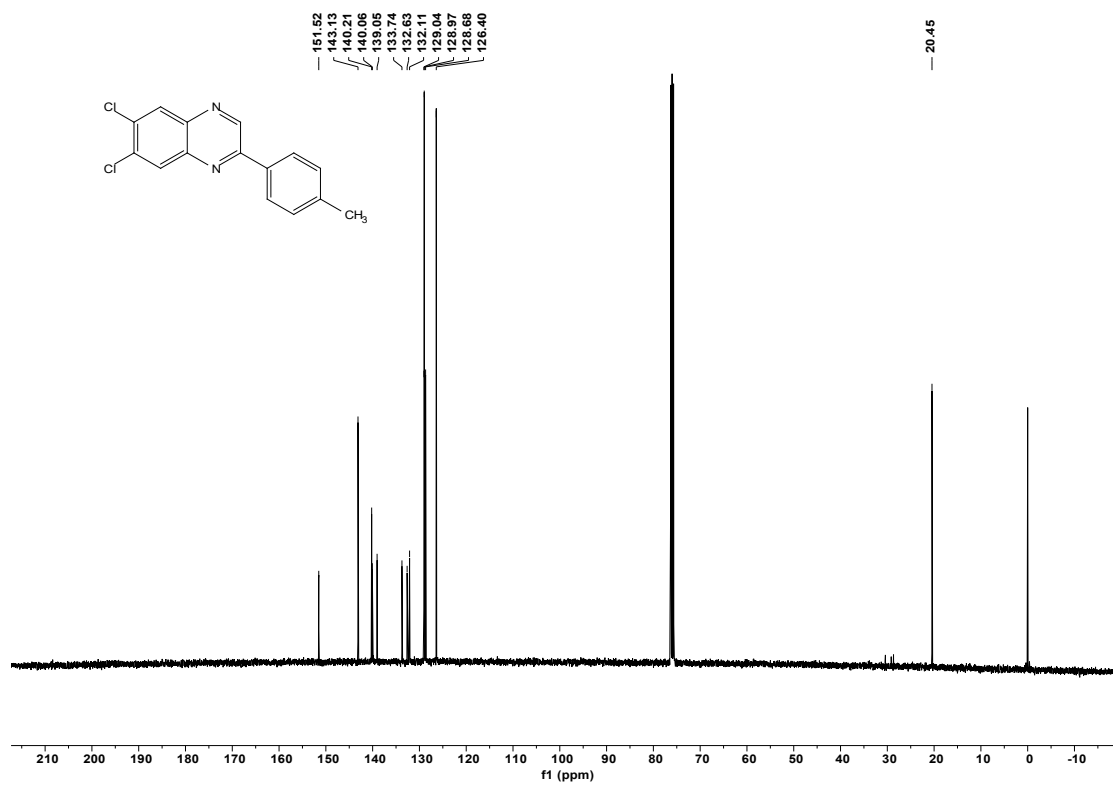

3s

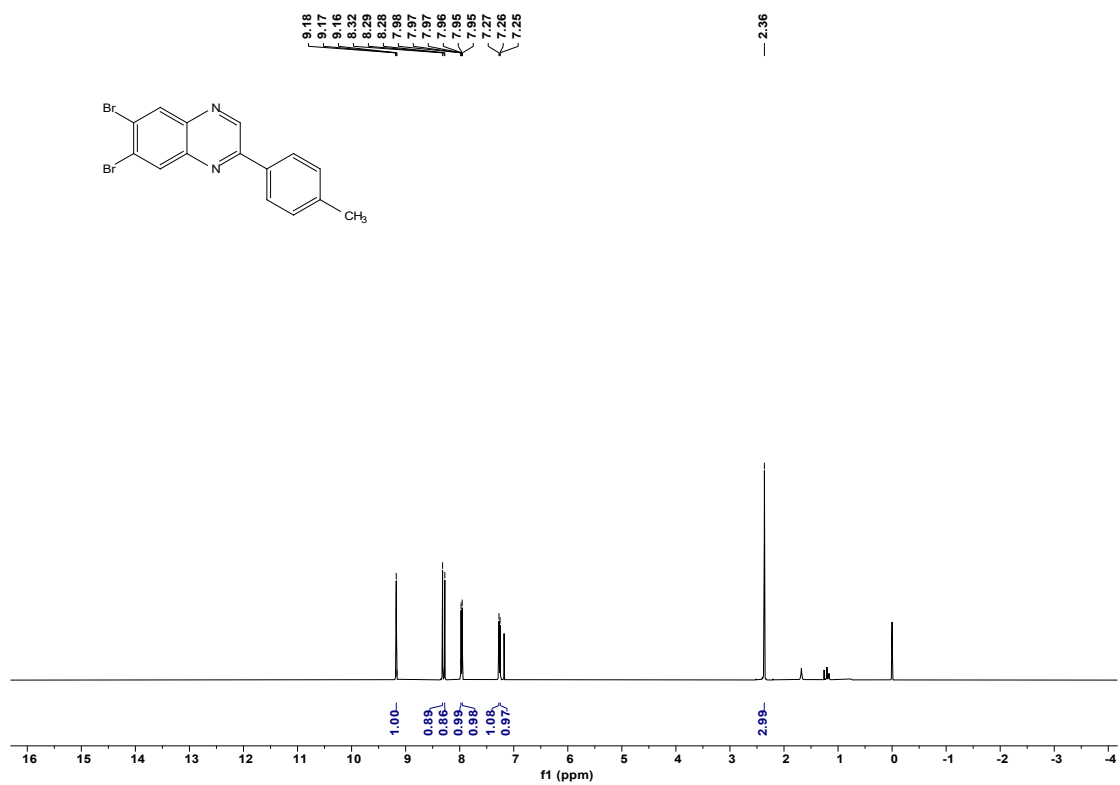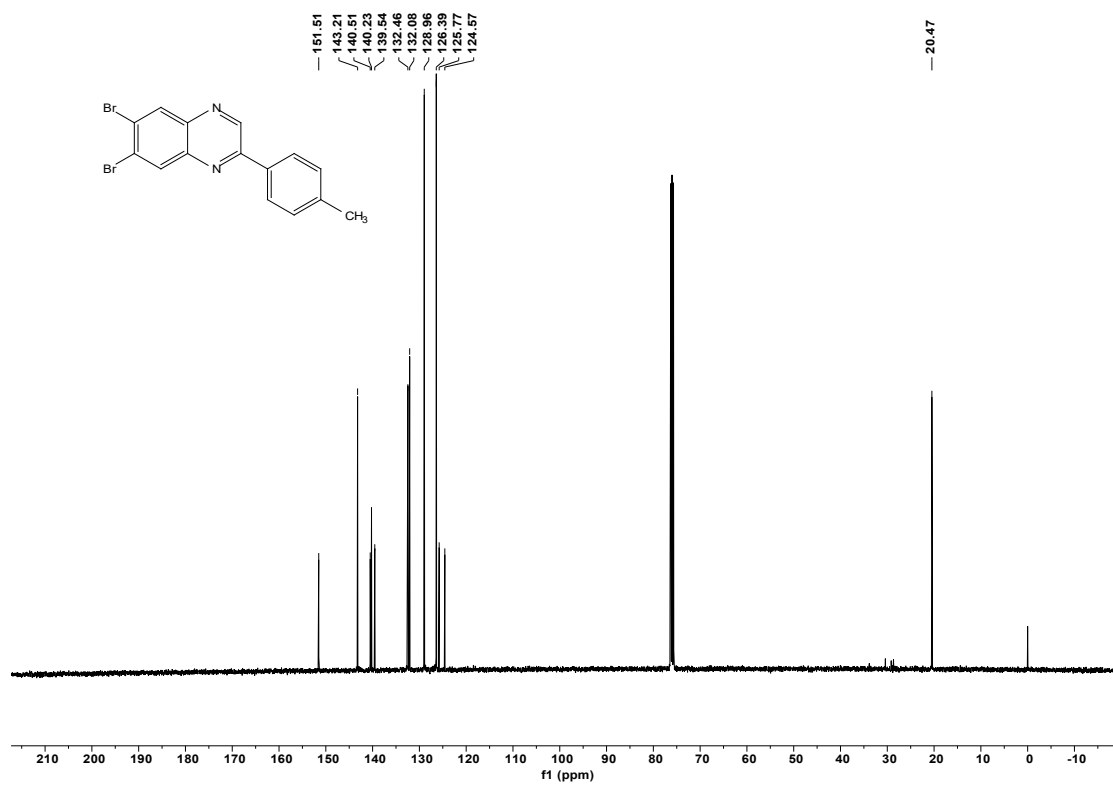

3t

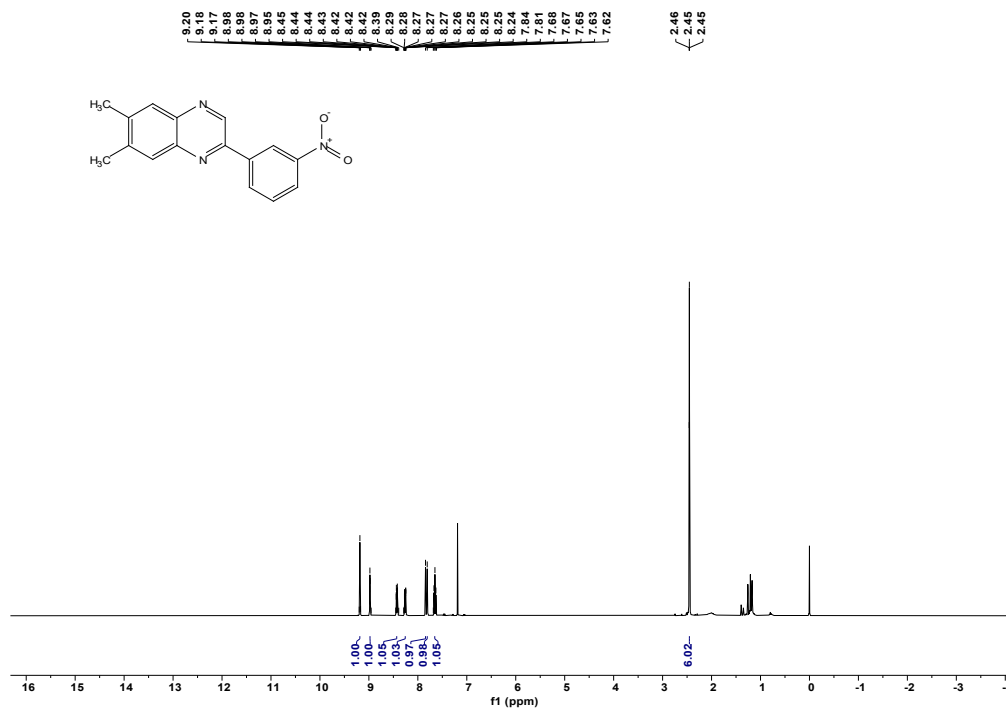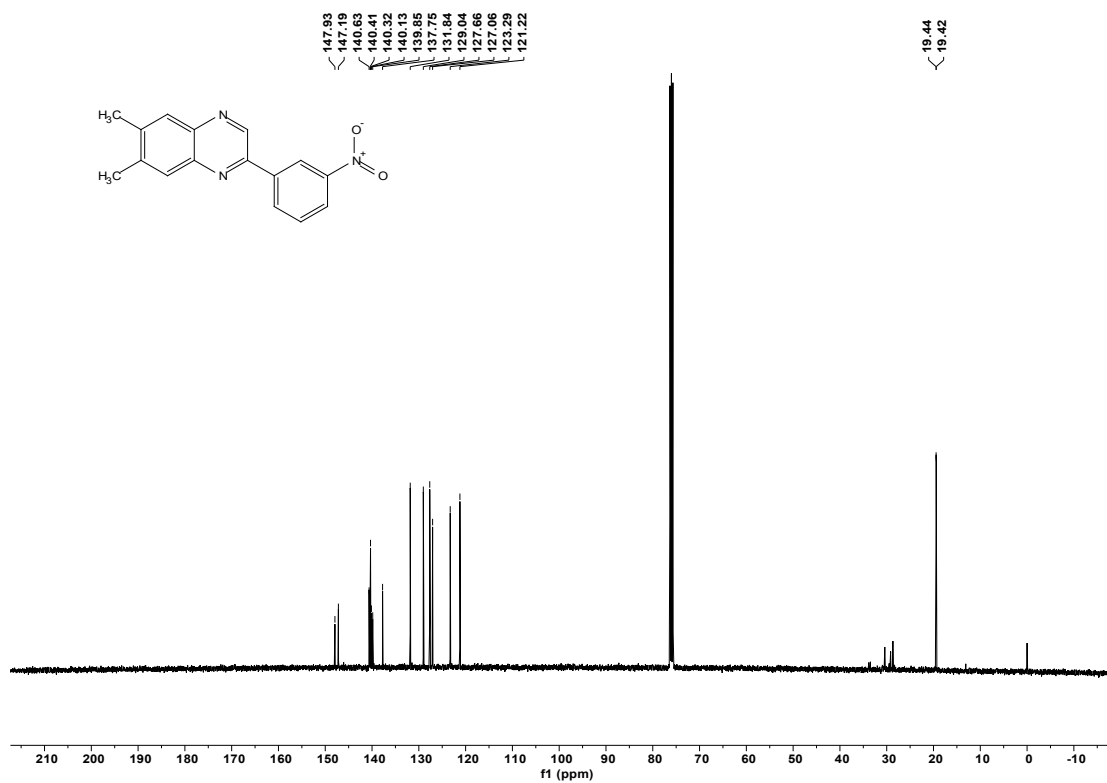

3u

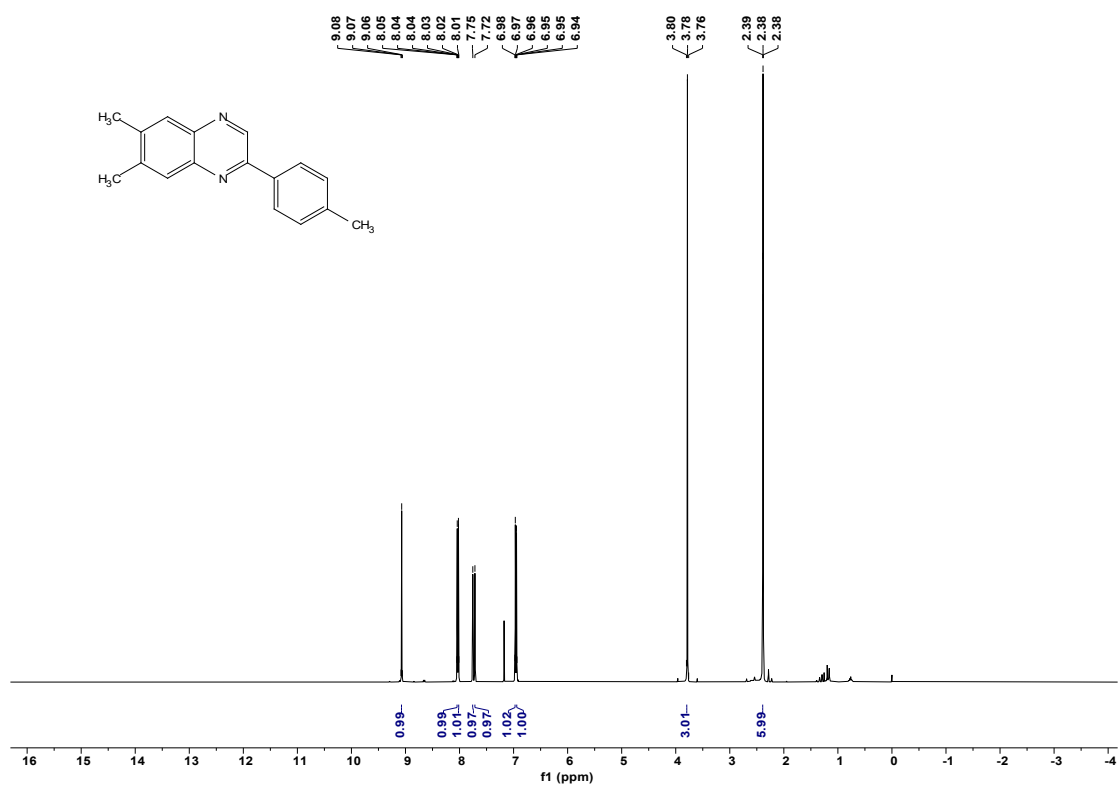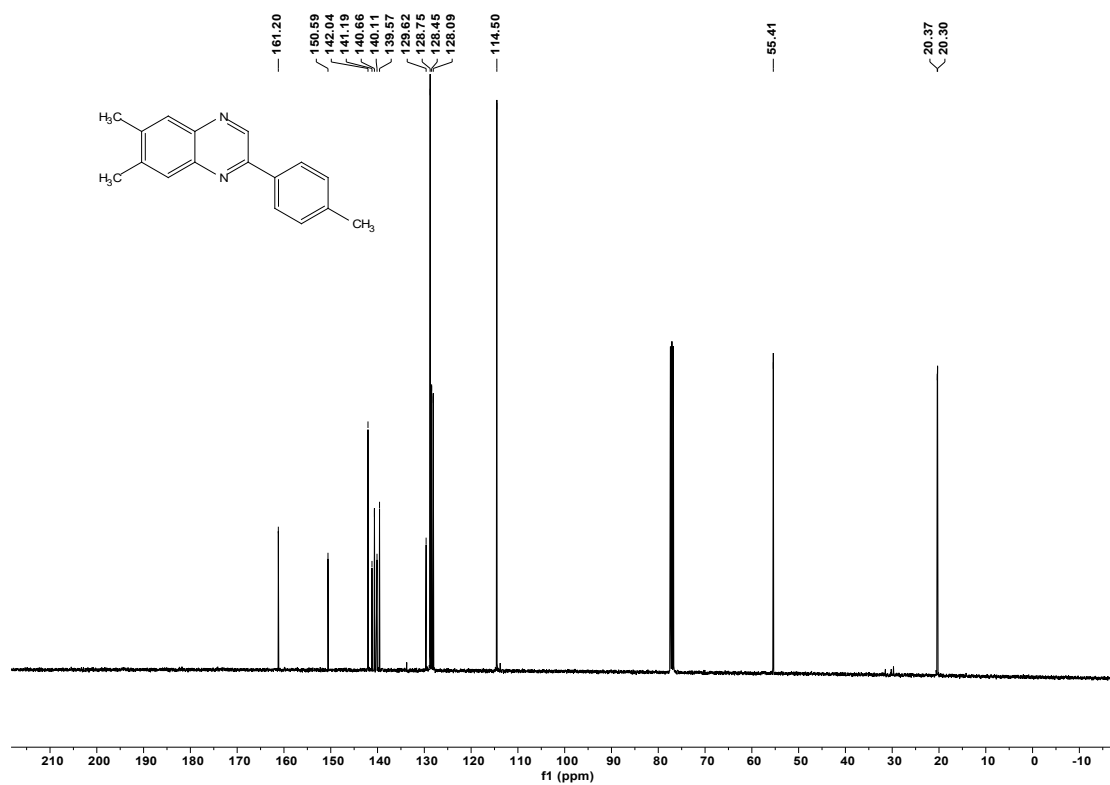

3v

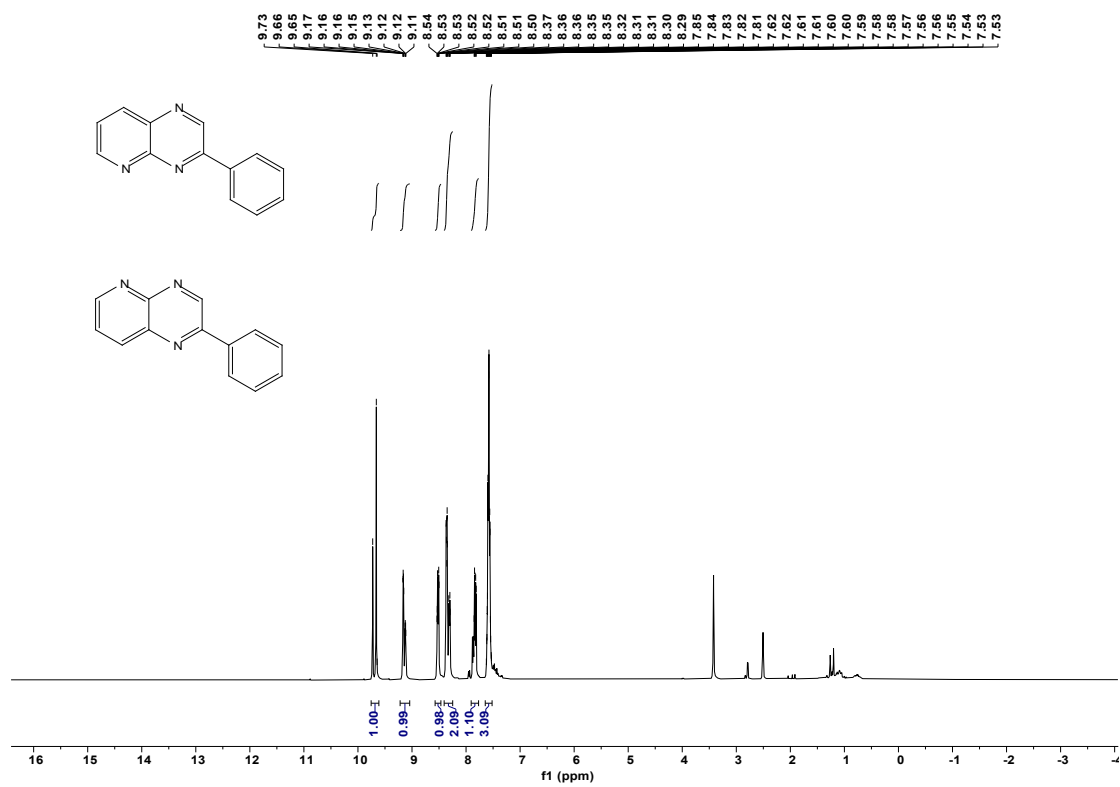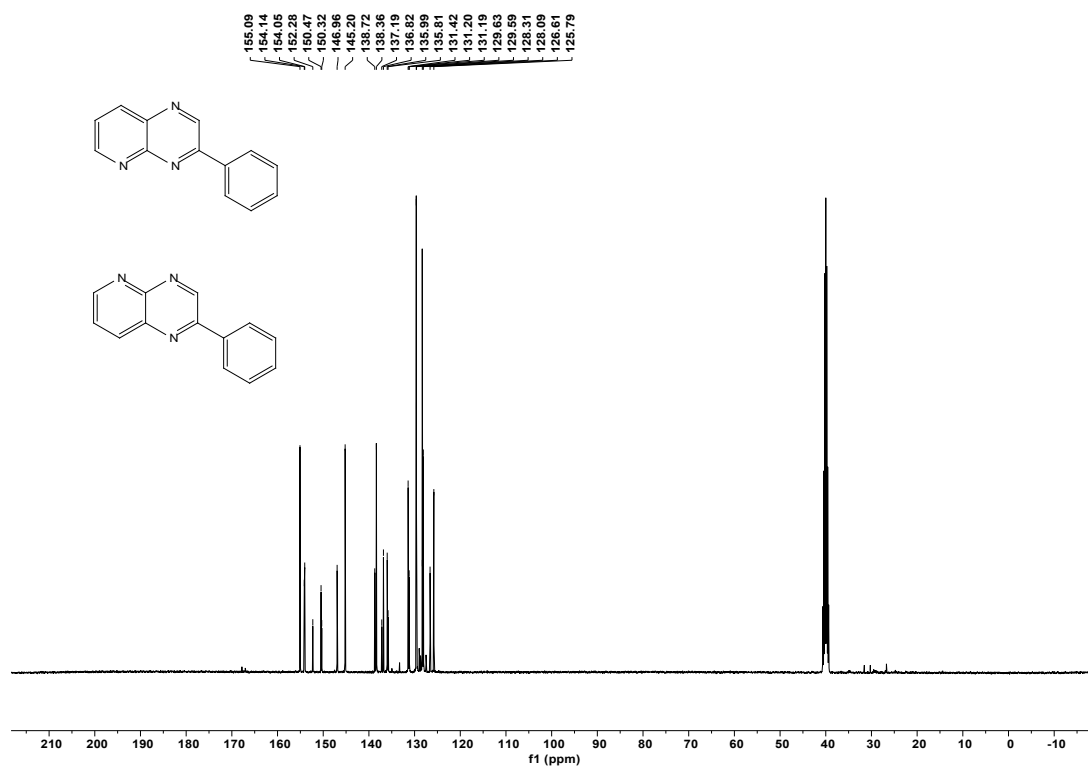

## 8. Optimized Structures and Cartesian Coordinates

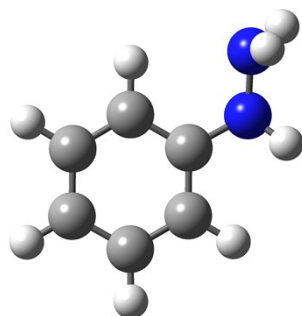

2a'

|   |             |             |             |
|---|-------------|-------------|-------------|
| C | -0.45018300 | -0.24612200 | 0.08316800  |
| C | 0.48592000  | -1.29121800 | 0.00260200  |
| C | 1.84900500  | -1.01365200 | -0.06178600 |
| C | 2.30668300  | 0.30597300  | -0.05546600 |
| C | 1.37463000  | 1.34305200  | 0.01856700  |
| C | 0.00711500  | 1.08022900  | 0.08700600  |
| H | 0.13960100  | -2.32353400 | -0.00320500 |
| H | 2.55650500  | -1.83696300 | -0.12331700 |
| H | 3.36999200  | 0.52100700  | -0.10994500 |
| H | 1.71319900  | 2.37648700  | 0.02182700  |
| H | -0.71773600 | 1.88376400  | 0.14229100  |
| N | -1.81355100 | -0.56420600 | 0.21257400  |
| H | -2.03082800 | -1.49568000 | -0.13441500 |
| N | -2.74071200 | 0.43832400  | -0.14825300 |
| H | -3.02549200 | 0.35065200  | -1.12583800 |
| H | -3.56442600 | 0.33586900  | 0.43781200  |

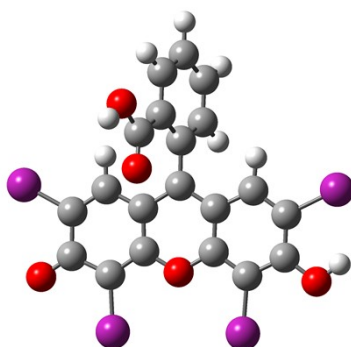

EY\*

|   |             |             |             |
|---|-------------|-------------|-------------|
| C | -0.02619300 | 1.17292200  | -0.24840600 |
| C | -1.06802300 | -1.06128500 | -0.09549300 |
| C | -1.22597500 | 0.33351300  | -0.21403200 |
| C | -2.53737000 | 0.85118300  | -0.32436600 |

|    |             |             |             |
|----|-------------|-------------|-------------|
| H  | -2.67206200 | 1.92002500  | -0.43447500 |
| C  | -3.64076800 | 0.02925500  | -0.29650600 |
| C  | -3.53396000 | -1.41449400 | -0.15910900 |
| C  | -2.16414700 | -1.91947400 | -0.06360500 |
| C  | -0.13289600 | 2.64508000  | -0.41377800 |
| C  | -0.58641100 | 3.52341800  | 0.60334700  |
| C  | 0.22092000  | 3.19972100  | -1.65484800 |
| C  | -0.69146400 | 4.89904000  | 0.34471000  |
| C  | 0.11851900  | 4.56856700  | -1.89882100 |
| H  | 0.56533300  | 2.53529600  | -2.44206600 |
| C  | -0.34533800 | 5.42223100  | -0.89747400 |
| H  | -1.04057300 | 5.55456800  | 1.13379700  |
| H  | 0.39241000  | 4.96376100  | -2.87313500 |
| H  | -0.43429900 | 6.48890800  | -1.08071700 |
| C  | -0.90615300 | 3.00128800  | 1.96159200  |
| O  | -0.81318800 | 1.84266800  | 2.31599300  |
| O  | -1.31981600 | 3.97326900  | 2.81454800  |
| H  | -1.49526200 | 3.52160300  | 3.66088500  |
| Br | -5.37678600 | 0.76277600  | -0.44229300 |
| O  | -4.52174200 | -2.17886800 | -0.12895800 |
| O  | 0.16516300  | -1.64355700 | -0.01562700 |
| Br | -1.91665600 | -3.76740800 | 0.09803800  |
| C  | 3.72264000  | -0.88054900 | -0.04578300 |
| C  | 3.66770700  | 0.52557700  | -0.14799000 |
| C  | 2.47795900  | 1.21827300  | -0.21559900 |
| C  | 1.23418400  | 0.53024900  | -0.19352800 |
| C  | 1.29659500  | -0.89165200 | -0.07463900 |
| C  | 2.50298600  | -1.57892200 | -0.00655000 |
| H  | 2.48792600  | 2.29837900  | -0.28164100 |
| Br | 5.32948500  | 1.47815900  | -0.18336700 |
| Br | 2.51306800  | -3.46516600 | 0.14284700  |
| O  | 4.87249700  | -1.57742000 | 0.01931200  |
| H  | 5.61745200  | -0.94753800 | -0.01242700 |

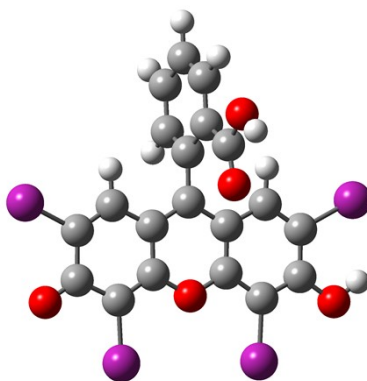



## EY

|    |             |             |             |
|----|-------------|-------------|-------------|
| C  | -0.06987900 | 1.13250500  | -0.25508000 |
| C  | -1.21967900 | -1.01824900 | -0.08523100 |
| C  | -1.25288100 | 0.42573400  | -0.20792000 |
| C  | -2.55318800 | 1.04776200  | -0.25579200 |
| H  | -2.60827300 | 2.12618800  | -0.34039400 |
| C  | -3.68491800 | 0.31025500  | -0.19717300 |
| C  | -3.69333000 | -1.17305100 | -0.07971300 |
| C  | -2.35399200 | -1.77223400 | -0.02697300 |
| C  | -0.06296200 | 2.61709500  | -0.44533300 |
| C  | 0.05465800  | 3.54312600  | 0.61642100  |
| C  | -0.17853900 | 3.10463100  | -1.75366400 |
| C  | 0.05002100  | 4.91896400  | 0.34153100  |
| C  | -0.17776000 | 4.47506400  | -2.01550800 |
| H  | -0.27348100 | 2.39683200  | -2.57187800 |
| C  | -0.06260900 | 5.38536500  | -0.96528800 |
| H  | 0.13355100  | 5.61740400  | 1.16579800  |
| H  | -0.27061900 | 4.82667600  | -3.03905000 |
| H  | -0.06400100 | 6.45343600  | -1.16105200 |
| C  | 0.17474400  | 3.06122700  | 2.02236500  |
| O  | 0.25532700  | 1.89791700  | 2.36087200  |
| O  | 0.19070100  | 4.07368000  | 2.92371300  |
| H  | 0.27000200  | 3.64916200  | 3.79827300  |
| Br | -5.38433500 | 1.14692700  | -0.26355100 |
| O  | -4.72924400 | -1.82456500 | -0.03243300 |
| O  | -0.01652500 | -1.66205200 | -0.02758300 |
| Br | -2.25753200 | -3.65314500 | 0.12684000  |
| C  | 3.57142000  | -1.11531900 | -0.11606300 |
| C  | 3.59846700  | 0.29106300  | -0.24088700 |
| C  | 2.44287500  | 1.04295000  | -0.29081700 |
| C  | 1.18495000  | 0.41749100  | -0.21640600 |
| C  | 1.15302800  | -0.98804100 | -0.09552200 |
| C  | 2.32385300  | -1.74885000 | -0.04540200 |
| H  | 2.50494400  | 2.11970900  | -0.38702100 |
| Br | 5.30822300  | 1.14664400  | -0.34241400 |
| Br | 2.22870800  | -3.62819000 | 0.11533700  |
| O  | 4.68159900  | -1.86985100 | -0.06617700 |
| H  | 5.46008900  | -1.28361400 | -0.12451800 |

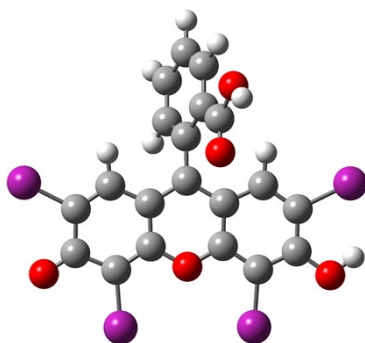

EY<sup>□</sup>

|    |             |             |             |
|----|-------------|-------------|-------------|
| C  | -0.03358300 | 1.17754300  | -0.16664100 |
| C  | -1.37323600 | -0.89796600 | -0.04498800 |
| C  | -1.30300000 | 0.52711300  | -0.11208900 |
| C  | -2.55442700 | 1.20449600  | -0.06675100 |
| H  | -2.56434900 | 2.28749400  | -0.05841500 |
| C  | -3.74328500 | 0.52457400  | -0.02073400 |
| C  | -3.87193200 | -0.92889100 | 0.00479900  |
| C  | -2.56593200 | -1.58163000 | 0.00295300  |
| C  | 0.04874900  | 2.62797000  | -0.41982700 |
| C  | 0.73226200  | 3.58536000  | 0.39266000  |
| C  | -0.57321200 | 3.11474000  | -1.59290800 |
| C  | 0.82013900  | 4.92989900  | -0.03030500 |
| C  | -0.48636300 | 4.44158000  | -1.98807300 |
| H  | -1.10323400 | 2.40255100  | -2.21750800 |
| C  | 0.22903100  | 5.36080500  | -1.20628800 |
| H  | 1.35370100  | 5.63413100  | 0.59734000  |
| H  | -0.95784900 | 4.75881500  | -2.91516400 |
| H  | 0.31479400  | 6.40005300  | -1.51277900 |
| C  | 1.25671000  | 3.23089600  | 1.72841300  |
| O  | 1.21865900  | 2.14207500  | 2.27011600  |
| O  | 1.81824400  | 4.30120700  | 2.38668500  |
| H  | 2.09554700  | 3.92510900  | 3.24138300  |
| Br | -5.38555900 | 1.51925400  | 0.03339900  |
| O  | -4.95449400 | -1.53629800 | 0.03720400  |
| O  | -0.21791500 | -1.64917300 | -0.02314700 |
| Br | -2.56485600 | -3.48797900 | 0.07542400  |
| C  | 3.41172500  | -1.41892200 | -0.13075100 |
| C  | 3.55180000  | -0.02963200 | -0.22503500 |
| C  | 2.47134300  | 0.83653400  | -0.22777300 |
| C  | 1.15068800  | 0.35216500  | -0.13061300 |
| C  | 1.00178600  | -1.05797800 | -0.06229300 |
| C  | 2.10241700  | -1.91707100 | -0.05629800 |
| H  | 2.64787100  | 1.90012700  | -0.31729800 |
| Br | 5.34181400  | 0.68359000  | -0.35092100 |

|    |            |             |             |
|----|------------|-------------|-------------|
| Br | 1.82912800 | -3.79551700 | 0.04297800  |
| O  | 4.45944000 | -2.28556000 | -0.11560600 |
| H  | 5.27350100 | -1.75294800 | -0.17512000 |

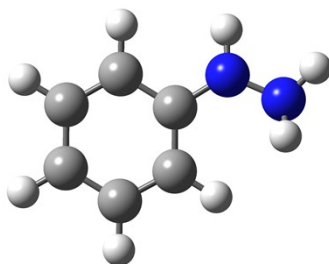

A

|   |             |             |             |
|---|-------------|-------------|-------------|
| C | 1.83445700  | 1.04107000  | -0.02746100 |
| C | 0.47706700  | 1.30827200  | -0.00072800 |
| C | -0.44158200 | 0.22775600  | 0.02513300  |
| C | 0.01314300  | -1.11260000 | 0.04147500  |
| C | 1.37630500  | -1.35321100 | 0.01449000  |
| C | 2.29053800  | -0.28615700 | -0.02487300 |
| H | 2.54346400  | 1.86183000  | -0.05086300 |
| H | 0.11365400  | 2.33267400  | -0.01239700 |
| H | -0.68227300 | -1.94145900 | 0.11928900  |
| H | 1.73855100  | -2.37568000 | 0.03894900  |
| H | 3.35611500  | -0.49099200 | -0.04305000 |
| N | -1.77755000 | 0.54055100  | 0.01396100  |
| H | -2.05447000 | 1.50319600  | 0.18889800  |
| N | -2.79261400 | -0.36107400 | 0.02802600  |
| H | -3.69828100 | 0.07027400  | -0.13331300 |
| H | -2.62518800 | -1.16696700 | -0.56963500 |

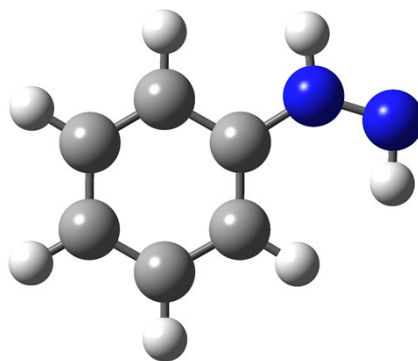

B

|   |             |             |             |
|---|-------------|-------------|-------------|
| C | -1.76637800 | -1.04967300 | -0.00000100 |
| C | -0.39716300 | -1.28588200 | -0.00000300 |
| C | 0.51067800  | -0.20866100 | 0.00000300  |
| C | 0.01296900  | 1.10660800  | -0.00000600 |

|   |             |             |             |
|---|-------------|-------------|-------------|
| C | -1.36257000 | 1.32589600  | 0.00000000  |
| C | -2.26260500 | 0.25814800  | 0.00000600  |
| H | -2.45138600 | -1.89329700 | -0.00000600 |
| H | -0.01765100 | -2.30572700 | -0.00000500 |
| H | 0.68838300  | 1.95642400  | -0.00003700 |
| H | -1.73274500 | 2.34771000  | -0.00000500 |
| H | -3.33284600 | 0.44068500  | 0.00001200  |
| N | 1.87629500  | -0.49287100 | 0.00000700  |
| H | 2.12990500  | -1.47368700 | -0.00002200 |
| N | 2.94238000  | 0.31756100  | -0.00000400 |
| H | 2.57603200  | 1.27643800  | 0.00004900  |

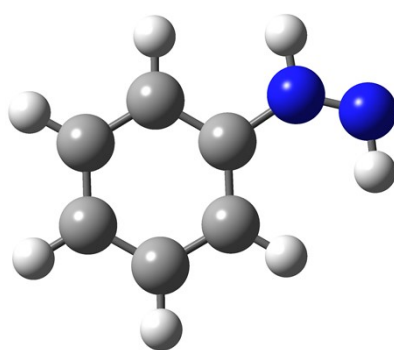

|   |             |             |             |
|---|-------------|-------------|-------------|
| C | -1.73521400 | -1.08279900 | 0.00000100  |
| C | -0.36252700 | -1.29086100 | 0.00000900  |
| C | 0.49390700  | -0.17354800 | 0.00000800  |
| C | 0.00094900  | 1.14489000  | 0.00001800  |
| C | -1.37184300 | 1.33077600  | -0.00000200 |
| C | -2.23745700 | 0.22328400  | -0.00001800 |
| H | -2.41096700 | -1.93117700 | 0.00000300  |
| H | 0.04327100  | -2.29988700 | 0.00002200  |
| H | 0.66044300  | 2.00773100  | 0.00008200  |
| H | -1.77749100 | 2.33685400  | 0.00000300  |
| H | -3.31091100 | 0.38557600  | -0.00004500 |
| N | 1.87481700  | -0.45349700 | -0.00000700 |
| H | 2.10935800  | -1.45470500 | 0.00003600  |
| N | 2.88968200  | 0.27847400  | -0.00001900 |
| H | 2.60791300  | 1.27031900  | -0.00001800 |

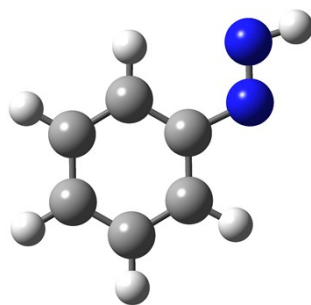

D

|   |             |             |            |
|---|-------------|-------------|------------|
| C | 1.30524300  | 1.32921700  | 0.00000000 |
| C | -0.06649500 | 1.10305300  | 0.00000000 |
| C | -0.54741800 | -0.21519100 | 0.00000000 |
| C | 0.34497000  | -1.29193500 | 0.00000000 |
| C | 1.72054900  | -1.05896500 | 0.00000000 |
| C | 2.20051500  | 0.25128300  | 0.00000000 |
| H | 1.68473700  | 2.34764900  | 0.00000000 |
| H | -0.77811200 | 1.92160400  | 0.00000000 |
| H | -0.06159800 | -2.29872300 | 0.00000000 |
| H | 2.41386800  | -1.89540600 | 0.00000000 |
| H | 3.27127800  | 0.43735300  | 0.00000000 |
| N | -1.93330400 | -0.57265200 | 0.00000000 |
| N | -2.72373400 | 0.39996100  | 0.00000000 |
| H | -3.67508700 | -0.00841300 | 0.00000000 |

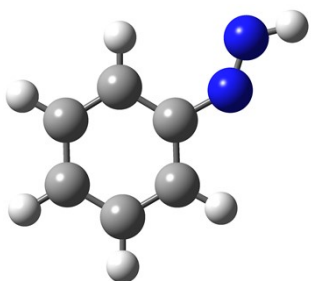

E

|   |             |             |             |
|---|-------------|-------------|-------------|
| C | 1.35840600  | 1.32255300  | 0.00000000  |
| C | -0.01332000 | 1.15807800  | 0.00000000  |
| C | -0.52144600 | -0.16773400 | 0.00000000  |
| C | 0.32121500  | -1.30283400 | 0.00000000  |
| C | 1.69327800  | -1.10440200 | 0.00000000  |
| C | 2.20700300  | 0.19938800  | 0.00000000  |
| H | 1.78045500  | 2.32234800  | 0.00000000  |
| H | -0.69511000 | 2.00226000  | 0.00000100  |
| H | -0.11285200 | -2.29706200 | 0.00000000  |
| H | 2.36424600  | -1.95651600 | -0.00000100 |
| H | 3.28263700  | 0.34860800  | -0.00000100 |
| N | -1.87068500 | -0.40329000 | 0.00000100  |

|   |             |             |             |
|---|-------------|-------------|-------------|
| N | -2.85696200 | 0.27505300  | -0.00000200 |
| H | -3.79665900 | -0.15228100 | 0.00000200  |

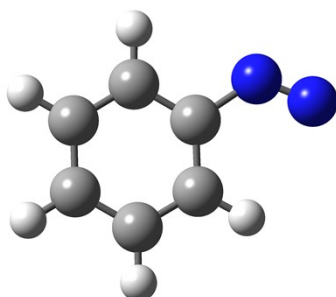

F

|   |             |             |            |
|---|-------------|-------------|------------|
| C | -1.27829700 | 1.31975900  | 0.00000000 |
| C | 0.09853200  | 1.11634900  | 0.00000000 |
| C | 0.59001000  | -0.19317800 | 0.00000000 |
| C | -0.27046400 | -1.28967500 | 0.00000000 |
| C | -1.64919100 | -1.07593100 | 0.00000000 |
| C | -2.15224400 | 0.22645300  | 0.00000000 |
| H | -1.67329200 | 2.33203100  | 0.00000000 |
| H | 0.79657000  | 1.94785900  | 0.00000000 |
| H | 0.15029300  | -2.29051000 | 0.00000000 |
| H | -2.32779700 | -1.92408400 | 0.00000000 |
| H | -3.22589300 | 0.39290500  | 0.00000000 |
| N | 2.01634700  | -0.48555500 | 0.00000000 |
| N | 2.87651700  | 0.33114600  | 0.00000000 |

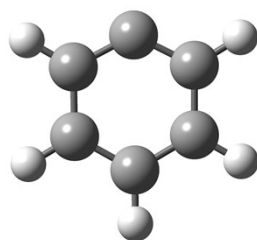

G

|   |             |             |             |
|---|-------------|-------------|-------------|
| C | -1.21419800 | 0.63260900  | -0.00000600 |
| C | -1.22640100 | -0.77179400 | 0.00002200  |
| C | -0.00001200 | -1.40013100 | -0.00001000 |
| C | 1.22640400  | -0.77178500 | -0.00000800 |
| C | 1.21421200  | 0.63258300  | 0.00001800  |
| C | -0.00000300 | 1.32471600  | -0.00000500 |
| H | -2.15467600 | 1.17909500  | -0.00002800 |
| H | -2.16291000 | -1.32331500 | -0.00000900 |
| H | 2.16288300  | -1.32336000 | -0.00002600 |
| H | 2.15466800  | 1.17910700  | 0.00001100  |
| H | 0.00002700  | 2.41128500  | -0.00002200 |

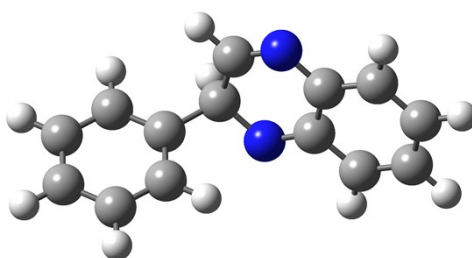

H

|   |             |             |             |
|---|-------------|-------------|-------------|
| C | 3.86317500  | -1.33488400 | -0.23016200 |
| C | 2.59609000  | -1.38949000 | -0.77480100 |
| C | 1.64682900  | -0.34715200 | -0.52678600 |
| C | 2.05345600  | 0.75240500  | 0.31528200  |
| C | 3.33741800  | 0.77959700  | 0.85570600  |
| C | 4.24194000  | -0.24974400 | 0.58768200  |
| H | 4.57495800  | -2.13090900 | -0.43087800 |
| H | 2.27717600  | -2.21162000 | -1.40823600 |
| H | 3.60823500  | 1.62020300  | 1.48764300  |
| H | 5.24079800  | -0.21584000 | 1.01300500  |
| C | 0.00417900  | 1.73763000  | 0.08560100  |
| C | -0.49712100 | 0.63962600  | -0.83379200 |
| H | -0.69564100 | 2.54603700  | 0.31090400  |
| N | 1.17098800  | 1.79702900  | 0.61548900  |
| N | 0.43265400  | -0.44858400 | -1.07604800 |
| C | -1.85186000 | 0.12282500  | -0.33764500 |
| C | -3.03555600 | 0.75519200  | -0.73342700 |
| C | -1.91960900 | -0.95209800 | 0.55543200  |
| C | -4.26887800 | 0.32425700  | -0.24278000 |
| H | -2.99471500 | 1.58513600  | -1.43616400 |
| C | -3.15252100 | -1.38754400 | 1.04177000  |
| H | -1.00551800 | -1.45607900 | 0.85445200  |
| C | -4.33006900 | -0.74945200 | 0.64696600  |
| H | -5.18068000 | 0.82200500  | -0.56223100 |
| H | -3.19297500 | -2.22757100 | 1.73025500  |
| H | -5.28971300 | -1.08987900 | 1.02650600  |
| H | -0.69226400 | 1.11239800  | -1.81561100 |

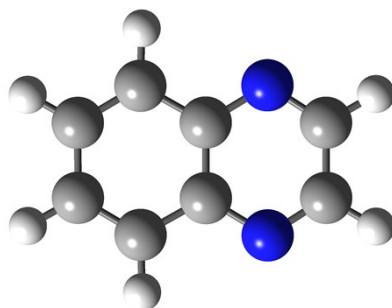

1a

|   |             |             |             |
|---|-------------|-------------|-------------|
| C | 2.37779100  | -0.70941500 | -0.00000500 |
| C | 1.19317100  | -1.41147100 | -0.00000600 |
| C | -0.04249600 | -0.71529600 | 0.00000900  |
| C | -0.04249000 | 0.71528700  | 0.00001300  |
| C | 1.19316900  | 1.41146400  | 0.00000600  |
| C | 2.37779200  | 0.70941600  | 0.00000100  |
| H | 3.32461700  | -1.24218300 | -0.00000800 |
| H | 1.16577800  | -2.49671600 | -0.00001100 |
| H | 1.16577900  | 2.49671000  | 0.00000200  |
| H | 3.32461400  | 1.24219200  | -0.00000200 |
| C | -2.31943800 | 0.71094300  | -0.00003300 |
| C | -2.31944500 | -0.71093900 | 0.00001000  |
| H | -3.26312900 | 1.25520600  | 0.00003400  |
| H | -3.26312700 | -1.25521300 | 0.00004500  |
| N | -1.21162900 | 1.42121800  | -0.00000200 |
| N | -1.21163600 | -1.42120900 | -0.00000300 |

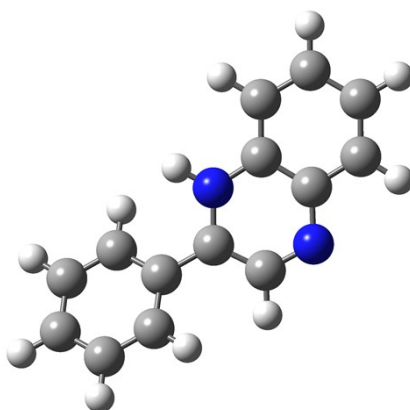

I

|   |             |             |             |
|---|-------------|-------------|-------------|
| C | -4.02440000 | 1.36127800  | -0.21961200 |
| C | -2.64989100 | 1.59615900  | -0.24474500 |
| C | -1.76197600 | 0.53002900  | -0.07753400 |
| C | -2.24049300 | -0.79686800 | 0.11520700  |
| C | -3.63252700 | -0.99837100 | 0.13988100  |
| C | -4.51498100 | 0.06442100  | -0.02541300 |



|   |             |             |             |
|---|-------------|-------------|-------------|
| H | -4.71148500 | 2.19223200  | -0.35107200 |
| H | -2.26295600 | 2.60232100  | -0.39311700 |
| H | -3.98635100 | -2.01387900 | 0.28795400  |
| H | -5.58646800 | -0.11279800 | -0.00554600 |
| C | -0.08286700 | -1.61453000 | 0.22721500  |
| C | 0.49524800  | -0.35684200 | 0.03324700  |
| H | 0.57857500  | -2.46309200 | 0.38640800  |
| N | -1.38888500 | -1.87396400 | 0.27292600  |
| N | -0.38471600 | 0.71209200  | -0.09481900 |
| C | 1.93032200  | -0.08804500 | 0.01573000  |
| C | 2.85000800  | -1.07788300 | -0.39288900 |
| C | 2.44325700  | 1.17122800  | 0.39422500  |
| C | 4.21621600  | -0.82031400 | -0.41004500 |
| H | 2.48376900  | -2.04393600 | -0.72628400 |
| C | 3.81247700  | 1.42655800  | 0.36556300  |
| H | 1.77117100  | 1.94259200  | 0.76176200  |
| C | 4.70824800  | 0.43424700  | -0.03556600 |
| H | 4.90206400  | -1.59874400 | -0.73373300 |
| H | 4.18086700  | 2.40234500  | 0.67128000  |
| H | 5.77567000  | 0.63422300  | -0.05780300 |
| H | -0.02150200 | 1.60543900  | -0.39819600 |

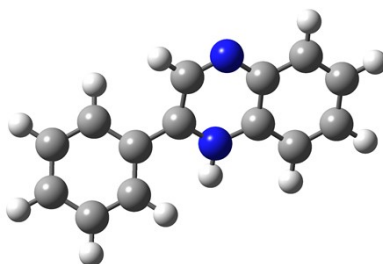

J

|   |             |             |             |
|---|-------------|-------------|-------------|
| C | -3.98740400 | 1.36301900  | -0.24030000 |
| C | -2.62703000 | 1.61009800  | -0.28131300 |
| C | -1.74996300 | 0.52997500  | -0.09678800 |
| C | -2.23687500 | -0.79336400 | 0.12328200  |
| C | -3.63515000 | -1.00662800 | 0.16032300  |
| C | -4.49266300 | 0.05825900  | -0.01960200 |
| H | -4.68103100 | 2.18615400  | -0.37983800 |
| H | -2.24336600 | 2.61247000  | -0.45100400 |
| H | -3.99159000 | -2.01662100 | 0.33123600  |
| H | -5.56608400 | -0.09777400 | 0.00659500  |
| C | -0.08867400 | -1.61905600 | 0.25905100  |
| C | 0.49183100  | -0.33051400 | 0.04299800  |
| H | 0.56738300  | -2.46617000 | 0.43283900  |

|   |             |             |             |
|---|-------------|-------------|-------------|
| N | -1.38103200 | -1.83794100 | 0.29484100  |
| N | -0.38078300 | 0.67824600  | -0.13108500 |
| C | 1.92687100  | -0.07144100 | 0.02400800  |
| C | 2.81311200  | -1.07106300 | -0.42688000 |
| C | 2.44459200  | 1.17107700  | 0.44720000  |
| C | 4.18097400  | -0.82285700 | -0.46787500 |
| H | 2.43174200  | -2.02303600 | -0.78211200 |
| C | 3.81372200  | 1.40658300  | 0.41133900  |
| H | 1.78958600  | 1.93372400  | 0.86231900  |
| C | 4.68315600  | 0.41249200  | -0.04992900 |
| H | 4.85555400  | -1.59174300 | -0.83049200 |
| H | 4.20627900  | 2.35762300  | 0.75668300  |
| H | 5.75226000  | 0.59949300  | -0.07634600 |
| H | -0.00701900 | 1.60426800  | -0.32926400 |

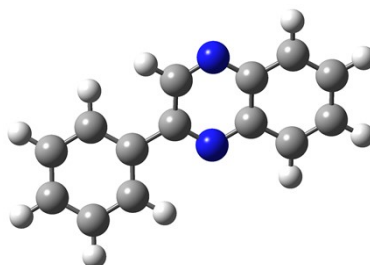

3a

|   |             |             |             |
|---|-------------|-------------|-------------|
| C | 3.95452500  | -1.40100300 | -0.16922700 |
| C | 2.59470000  | -1.61900700 | -0.18013600 |
| C | 1.70069900  | -0.52372300 | -0.05736900 |
| C | 2.22951000  | 0.79639200  | 0.08082500  |
| C | 3.63246100  | 0.99223800  | 0.08817700  |
| C | 4.47724700  | -0.08910700 | -0.03571000 |
| H | 4.63858200  | -2.23983400 | -0.26447500 |
| H | 2.17155100  | -2.61346100 | -0.28365300 |
| H | 4.00539600  | 2.00630200  | 0.19476900  |
| H | 5.55360600  | 0.05849600  | -0.03071800 |
| C | 0.10578100  | 1.61810600  | 0.19652000  |
| C | -0.44237000 | 0.30279300  | 0.03102900  |
| H | -0.55391400 | 2.47137000  | 0.33727100  |
| N | 1.39405600  | 1.86778600  | 0.21820300  |
| N | 0.35876100  | -0.74576300 | -0.08078400 |
| C | -1.90730800 | 0.06807400  | 0.00506700  |
| C | -2.81897300 | 1.09373000  | -0.29609700 |
| C | -2.40756500 | -1.21627600 | 0.27985700  |
| C | -4.19071000 | 0.84394400  | -0.31171600 |
| H | -2.46297200 | 2.08836000  | -0.54640400 |

|   |             |             |             |
|---|-------------|-------------|-------------|
| C | -3.77720400 | -1.46265900 | 0.26701600  |
| H | -1.70239300 | -2.00968300 | 0.50230200  |
| C | -4.67546800 | -0.43305700 | -0.02643700 |
| H | -4.88013100 | 1.64825000  | -0.55369100 |
| H | -4.14657000 | -2.46054100 | 0.48818200  |
| H | -5.74481400 | -0.62608700 | -0.03630900 |
